# Supplementary material for: Bay-Region Functionalisation of Ar-BIAN Ligands and Their Use Within Highly Absorptive Cationic Iridium(III) Dyes
Source: PubMed Central journal article supplement (PMC5686200; doi:10.1038/s41598-017-14996-4), 2017-11-14
Supplement: 41598_2017_14996_MOESM1_ESM.pdf [file 41598_2017_14996_MOESM1_ESM.pdf]

# Bay-Region Functionalisation of Ar-BIAN Ligands and Their Use Within Highly Absorptive Cationic Iridium(III) Dyes

Kamrul Hasan,<sup>a,b</sup> Jingyi Wang,<sup>c</sup> Amlan K. Pal,<sup>d</sup> Claus Hierlinger,<sup>d,e</sup> Véronique Guerschais,<sup>e</sup> Han Sen Soo,<sup>c,f\*</sup> Felipe García,<sup>c\*</sup> and Eli Zysman-Colman<sup>a,d\*</sup>

<sup>a</sup> Département de Chimie, Université de Sherbrooke, 2500 Boul. de l'Université, Sherbrooke, QC, Canada, J1K 2R1;

<sup>b</sup> Department of Chemistry, College of Sciences, University of Sharjah, Sharjah, P. O. Box 27272, UAE;

<sup>c</sup> Division of Chemistry and Biological Chemistry, School of Physical and Mathematical Sciences, Nanyang Technological University, 21 Nanyang Link 637371, Singapore;

<sup>d</sup> Organic Semiconductor Centre, EaStCHEM School of Chemistry, University of St Andrews, St Andrews, Fife, KY16 9ST, UK, Fax: +44-1334 463808; Tel: +44-1334 463826

<sup>e</sup> Institut des Sciences Chimiques de Rennes, UMR 6226 CNRS-Université de Rennes 1, Campus de Beaulieu, 35042 Rennes Cedex, France. E-mail: [veronique.guerchais@univ-rennes1.fr](mailto:veronique.guerchais@univ-rennes1.fr).

<sup>f</sup> Solar Fuels Laboratory, Nanyang Technological University, 50 Nanyang Avenue, Singapore 639798;

## SUPPLEMENTARY INFORMATION

### *Table of Contents:*

|                                                                            | <b>Pages</b> |
|----------------------------------------------------------------------------|--------------|
| General procedures                                                         | S2           |
| Synthesis of compounds <b>6</b> , <b>10</b> and <b>11</b>                  | S2-S3        |
| Synthesis of (C <sup>^</sup> N) ligands                                    | S3-S4        |
| Photophysical and electrochemical characterisation protocols               | S4-S5        |
| Steady-state photoluminescence measurements                                | S5           |
| Fluorescence quantum yield measurements                                    | S5           |
| Transient absorption and emission spectroscopic measurements               | S6           |
| <sup>1</sup> H and <sup>13</sup> C NMR spectra                             | S7-S24       |
| Computational section                                                      | S25-S43      |
| Transient absorption, emission, and steady-state photoluminescence spectra | S44-S46      |
| References                                                                 | S47-S48      |

## General Procedures

Commercial chemicals were used as supplied. All reactions were performed using standard Schlenk techniques under inert (N<sub>2</sub>) atmosphere with freshly distilled anhydrous solvents obtained from a Pure Solv<sup>TM</sup> solvent purification system from Innovative Technologies, except where specifically mentioned. The iridium dimer [(ppy)<sub>2</sub>Ir-(μ-Cl)]<sub>2</sub><sup>1</sup> and *p*-NMe<sub>2</sub>Ph-BIAN<sup>2</sup> were prepared following the previously published procedures. Flash column chromatography was performed using silica gel (Silia-P from Silicycle, 60 Å, 40-63 μm). Analytical thin layer chromatography (TLC) was performed on silica plates with aluminum backings (250 μm with indicator F-254). Compounds were visualised under UV light. The <sup>1</sup>H and <sup>13</sup>C NMR spectra were recorded on a Bruker Avance spectrometer at 500 MHz for complexes **2-4**, 400 MHz for complex **5** and 125 MHz for all the complexes, respectively. The following abbreviations have been used for multiplicity assignments: “s” for singlet, “d” for doublet, “t” for triplet, “m” for multiplet, and “br” for broad. Deuterated chloroform (CDCl<sub>3</sub>), deuterated acetonitrile (CD<sub>3</sub>CN) were used as the solvents for the NMR spectroscopic measurements. Melting points (Mp’s) were recorded using open-ended capillaries on a Meltemp melting point apparatus and were uncorrected. Each of the high-resolution mass spectrum (HRMS) was recorded on a quadrupole time-of-flight (ESI-Q-TOF) model Maxis from Bruker in positive electrospray ionisation mode, using sodium formate solution as a calibrant.

## Synthesis of compounds **6**, **10** and **11**

**5-bromo-1,2-dihydroacenaphthene, 6**: To a 0 °C solution of acenaphthene (5.20 g, 33.7 mmol, 1.0 equiv.) in 50 mL acetonitrile (MeCN) was added dropwise, a solution of *N*-bromosuccinimide (NBS) (6.00 g, 33.7 mmol, 1.0 equiv.). The solution was allowed to warm to room temperature (RT) and stirred for 19 h. The reaction was quenched with 100 mL of H<sub>2</sub>O, hexanes were added, and the layers separated. The aqueous phase was extracted 3 x 100 mL hexanes. The organic phase was dried over MgSO<sub>4</sub>, filtered under vacuum, and concentrated under reduced pressure to obtain the desired product. The crude product (*R<sub>f</sub>* of 0.3, DCM on silica) was purified by column chromatography with silica gel using DCM/hexanes (1:1). A yellow solid (7.2 g) was collected. Yield: 91%. Mp 52 °C. <sup>1</sup>H NMR (400 MHz, CDCl<sub>3</sub>) δ (ppm): 7.77 (d, *J* = 8.37 Hz, 1 H), 7.66 (d, *J* = 7.34 Hz, 1 H), 7.55 (t, *J* = 8.34 Hz, 1 H), 7.33 (d, *J* = 6.85 Hz, 1 H),

7.14 (dt,  $J = 1.35, 7.35$  Hz, 1 H), 3.42 (m, 2 H), 3.34 (m, 2 H).  $^{13}\text{C}$  NMR (100 MHz,  $\text{CDCl}_3$ )  $\delta$  (ppm): 147.2, 146.5, 140.5, 131.1, 129.3, 122.0, 120.4, 120.3, 117.0, 30.9, 30.2. HRMS (EI, 70 eV):  $[\text{M}]^+$  Calculated: ( $\text{C}_{12}\text{H}_9\text{Br}$ ) 231.9888; Found: 231.9892. This compound has been previously reported where characterisation was limited to a melting point (Mp: 96-98 °C).<sup>3</sup> However, the melting point for commercially available 5-bromo-1,2-dihydroacenaphthene is 54-56 °C, which is in line with our experimental results 52 °C.

**4-*N,N*-dimethylaminonitrobenzene, 10:** This compound was prepared in accordance to a previously published procedure.<sup>4</sup> Lemon yellow needle like crystals (2.57 g) were collected. Yield: 55%. Mp 165 °C.  $^1\text{H}$  NMR (400 MHz,  $\text{CDCl}_3$ )  $\delta$  (ppm): 8.09 (m, 2 H), 6.58 (m, 2 H), 3.10 (s, 6 H). The characterisation matches that reported.<sup>5</sup>

***N,N*-dimethylaminoaniline, 11:** This compound was prepared by adapting a previously published protocol<sup>6</sup> to yield black solid (0.802 g). Yield: 85%.  $^1\text{H}$  NMR (400 MHz,  $\text{CDCl}_3$ )  $\delta$  (ppm): 6.69 (d,  $J = 9$  Hz), 6.67 (d,  $J = 9$  Hz), 3.36 (s, 2 H), 2.82 (s, 6 H). The characterisation matches that reported.<sup>7</sup>

### Synthesis for the modification of cyclometallating ( $\text{C}^{\wedge}\text{N}$ ) ligands:

**2-(4'-methoxyphenyl)-5-methylpyridine.**<sup>8</sup> The precursor *p*-methoxybenzeneboronic acid was prepared from 4-bromoanisole following a previously reported procedure.<sup>9</sup> Compound 2-bromo-5-methylpyridine (0.595 g, 3.85 mmol, 1.0 equiv.),  $\text{K}_2\text{CO}_3$  (1.43 g, 10.3 mmol, 3.0 equiv.), and *p*-methoxybenzeneboronic acid (0.657 g, 4.48 mmol, 1.25 equiv.) were dissolved in degassed dioxane/ $\text{H}_2\text{O}$  (40 mL/10 mL). Subsequently,  $\text{Pd}(\text{PPh}_3)_4$  (0.200 g, 0.18 mmol, 5 mol%) was added and the solution was degassed three times. The reaction mixture was then heated at reflux for 19 h. Upon cooling,  $\text{H}_2\text{O}$  (50 mL) was added and the crude product was extracted with DCM (50 mL). The organic layer was separated and dried over anhydrous  $\text{MgSO}_4$ . Removal of the solvent under reduced pressure gave a dark slurry (product  $R_f$  of 0.25, 10% EtOAc/hexanes on silica), which was purified by column chromatography on silica gel (EtOAc/hexane, 1:9) to afford an off-white solid (0.675 g). Yield: 95%.  $^1\text{H}$  NMR (400 MHz,  $\text{CDCl}_3$ )  $\delta$  (ppm): 8.48 (s, 1 H), 7.92 (m, 2 H), 7.54 (dt,  $J = 4.95, 8.17$  Hz, 2 H), 6.99 (m, 2 H), 3.86 (s, 3 H), 2.35 (s, 3 H). The characterisation matches that previously reported.<sup>10,11</sup>

**2-(3'-methoxyphenyl)-5-methylpyridine.**<sup>12</sup> The precursor *m*-methoxybenzeneboronic acid was prepared from 3-bromoanisole following a previously reported procedure.<sup>13</sup> 2-Bromo-5-methylpyridine (1.84 g, 10.7 mmol, 1.0 equiv.), K<sub>2</sub>CO<sub>3</sub> (4.43 g, 32.1 mmol, 3.0 equiv.) and *m*-methoxybenzeneboronic acid (1.96 g, 13.4 mmol, 1.25 equiv.) were dissolved in degassed dioxane/H<sub>2</sub>O (5:1 v/v) in order to obtain a 0.05 M concentration in 2-bromo-5-methylpyridine. Pd(PPh<sub>3</sub>)<sub>4</sub> (0.60 g, 0.54 mmol, 5 mol%) was then added and the solution was degassed three times. The reaction mixture was heated at reflux for 19 h. Upon cooling, the solution was quenched with equal volume of H<sub>2</sub>O and diluted with equal volume of DCM. The organic layer was separated and dried over anhydrous MgSO<sub>4</sub>, filtered under vacuum, and concentrated under reduced pressure to obtain desired product (*R<sub>f</sub>* of 0.20, 10% EtOAc/hexanes on silica). A colorless, oily liquid (0.996 g) was collected. Yield: 47%. <sup>1</sup>H NMR (400 MHz, CDCl<sub>3</sub>) δ (ppm): 8.51 (dd, *J* = 0.70, 1.85 Hz, 1 H), 7.61 (d, *J* = 8.06 Hz, 1 H), 7.54 (m, 2 H), 7.51 (ddd, *J* = 0.87, 1.46, 7.68, 1 H), 7.36 (m, 1 H), 6.94 (t, *J* = 8.17 Hz, 1 H), 3.88 (s, 3 H), 2.36 (s, 3 H). The characterisation matches that previously reported.<sup>14</sup>

**Photophysical and Electrochemical Characterisation protocols:** All samples were prepared in HPLC grade MeCN with varying concentrations on the order of μM. Absorption spectra were recorded at RT using a Shimadzu UV-1800 double beam spectrophotometer. Molar extinction coefficients were determined by a linear least-squares fit of values obtained from the absorbances measured from at least three independent solutions at varying concentrations ranging from 6.81 x 10<sup>-1</sup> to 2.39 x 10<sup>2</sup> μM.

Cyclic voltammetry measurements were performed on an Electrochemical Analyzer potentiostat model 600D from CH Instruments. Solutions for cyclic voltammetry were prepared in MeCN and by nitrogen bubbling for about 10 min prior to the measurements. Tetra(*n*-butyl)ammoniumhexafluorophosphate (TBAPF<sub>6</sub>; ca. 0.10 M in MeCN) was used as the support-

ing electrolyte. A non-aqueous Ag/Ag<sup>+</sup> electrode (silver wire in a solution of 0.10 M AgNO<sub>3</sub> in MeCN) was used as the pseudoreference electrode; a glassy-carbon electrode was used for the working electrode, and a Pt electrode was used as the counter electrode. The redox potentials are reported relative to a normal hydrogen electrode (NHE) electrode with a ferrocenium/ferrocene (Fc<sup>+</sup>/Fc) redox couple as an internal reference (0.63 V vs NHE).<sup>15</sup>

### Steady-state photoluminescence measurements

The steady-state photoluminescence (PL) measurements for **4** (in DCM and MeCN) and **5** (in DCM) were conducted using a Cary Eclipse Fluorescence Spectrophotometer from Varian Technologies. The samples were prepared, each with a concentration of 0.050 mM, in a glovebox under a N<sub>2</sub> atmosphere. The excitation and emission slit widths were opened to the maximum of 10 nm for all PL measurements of **4** and **5** due to their weak signals.

### Fluorescence quantum yield measurements

The fluorescence quantum yield  $\Phi$  for **4** was obtained by comparing its PL intensity with that from [Ru(bpy)<sub>3</sub>](PF<sub>6</sub>)<sub>2</sub> in a 0.050 mM DCM solution. The calculation was conducted using the following expression:

$$\Phi = \Phi_{\text{ref}} \frac{I_{\text{Aref}}}{A_{\text{Iref}}}$$

where  $\Phi_{\text{ref}}$  is the quantum yield of the reference compound ( $\Phi_{\text{ref}} = 0.029$  for [Ru(bpy)<sub>3</sub>](PF<sub>6</sub>)<sub>2</sub> in DCM);<sup>19</sup>  $I$  and  $I_{\text{ref}}$  refer to the integrated fluorescence intensities of the sample and the reference compound respectively;  $A$  and  $A_{\text{ref}}$  are the absorbances at the wavelength of excitation for the sample and for the reference compound respectively.

### **Transient absorption and emission spectroscopic measurements**

The transient absorption and emission spectra were obtained using a LP920 transient absorption spectrometer from Edinburgh instrument, with a power of 1.39 kV and a Q-switch delay of 106  $\mu$ s. Each sample was prepared with a concentration of 0.050 mM in a glovebox under a N<sub>2</sub> atmosphere. UV-vis spectra were collected before and after the transient absorption/emission spectroscopic measurements to ensure that minimal compound decomposition occurred during these studies.

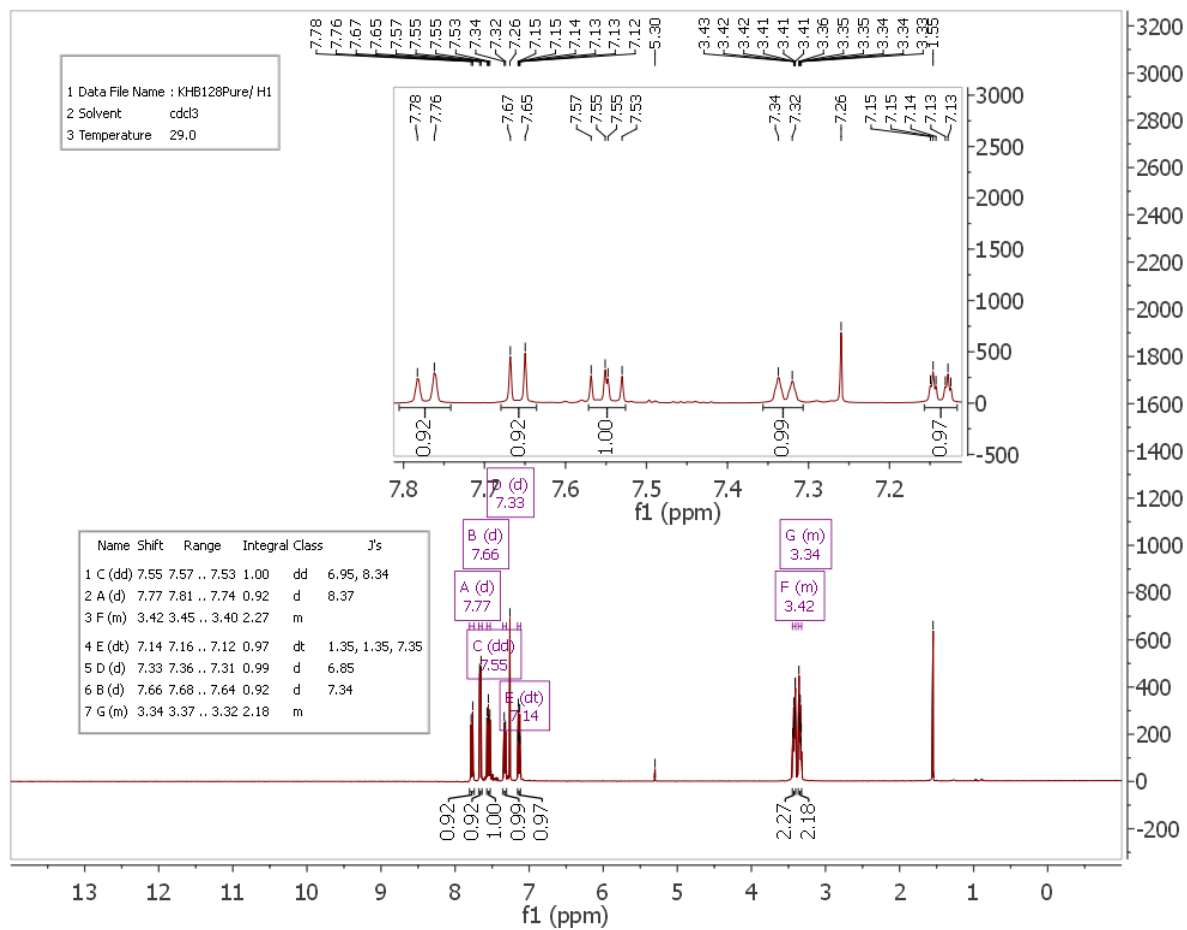

**Supplementary Figure S1.**  $^1\text{H}$  NMR spectrum of 5-bromo-1,2-dihydroacenaphthylene (**6**) in  $\text{CDCl}_3$

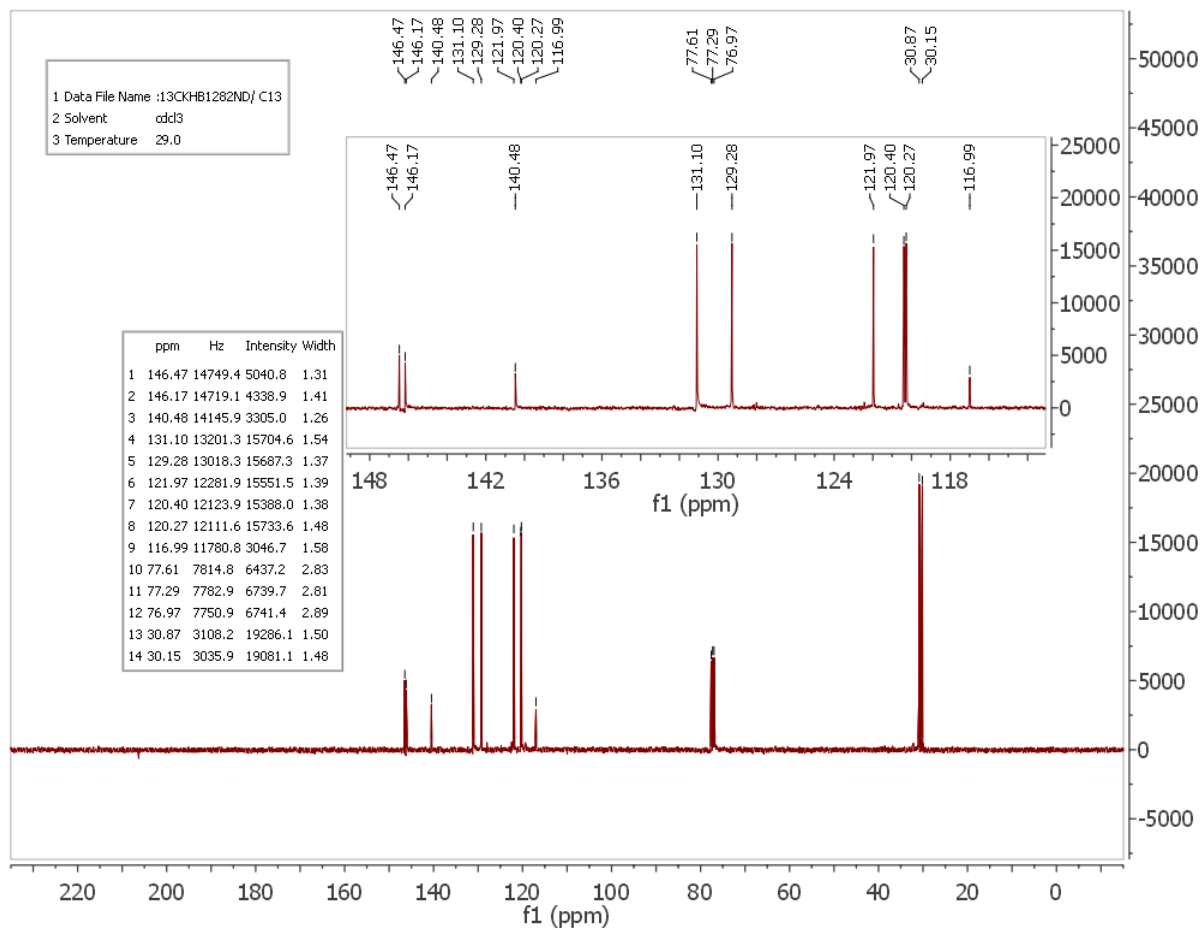

**Supplementary Figure S2.**  $^{13}\text{C}$  NMR spectrum of 5-bromo-1,2-dihydroacenaphthylene (**6**) in  $\text{CDCl}_3$



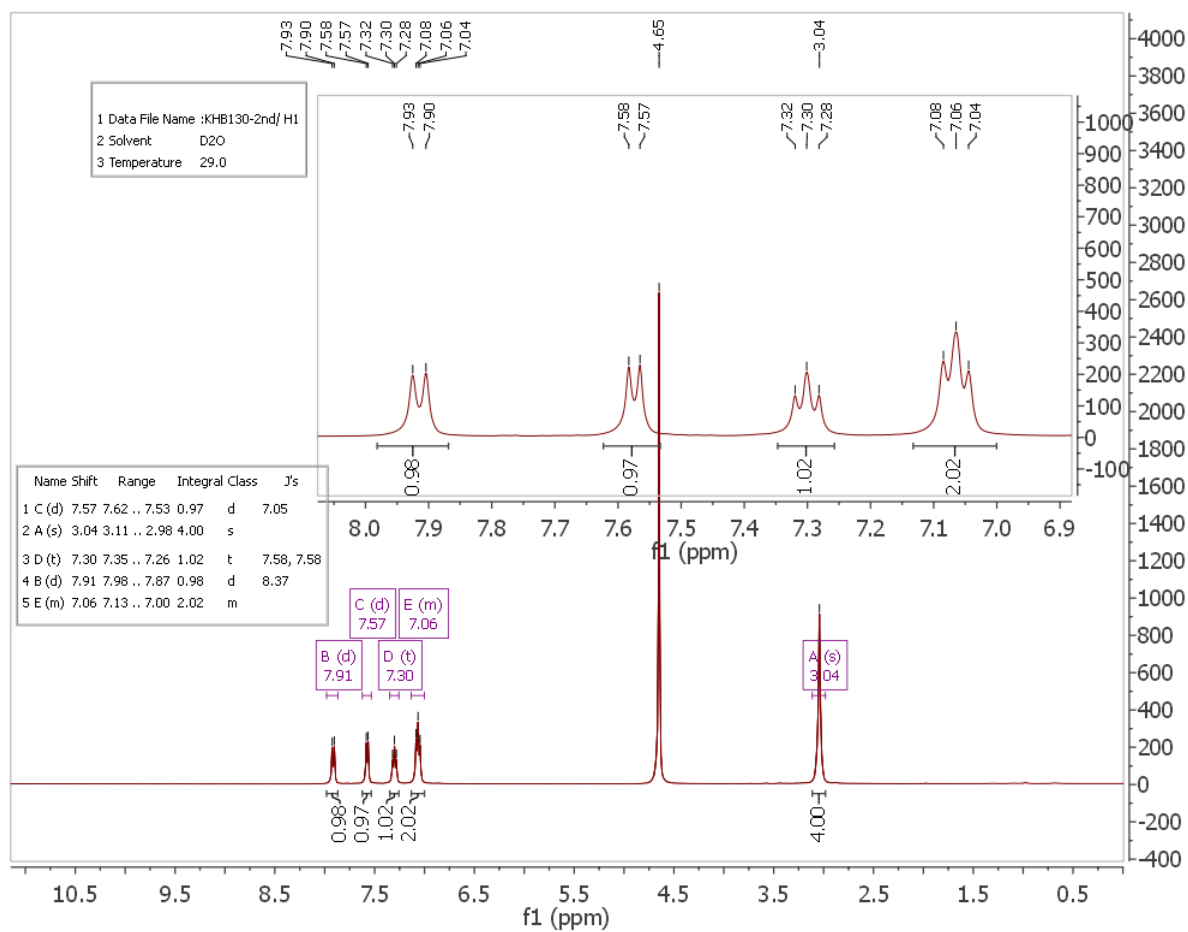

**Supplementary Figure S3.**  $^1\text{H}$  NMR spectrum of 5-carboxy-1,2-dihydroacenaphthylene (**7**) in  $\text{D}_2\text{O}$

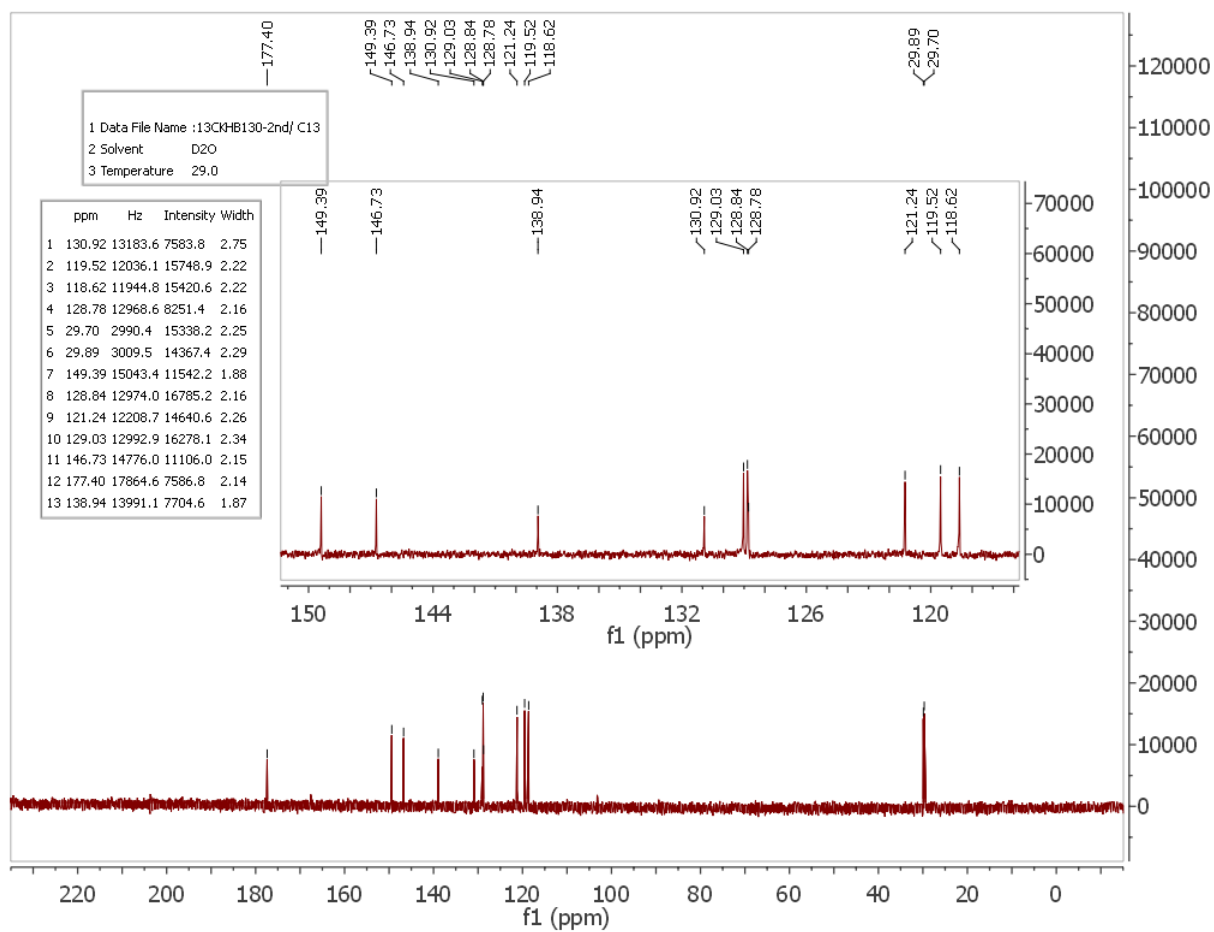

**Supplementary Figure S4.**  $^{13}\text{C}$  NMR spectrum of 5-carboxy-1,2-dihydroacenaphthylene (**7**) in  $\text{D}_2\text{O}$

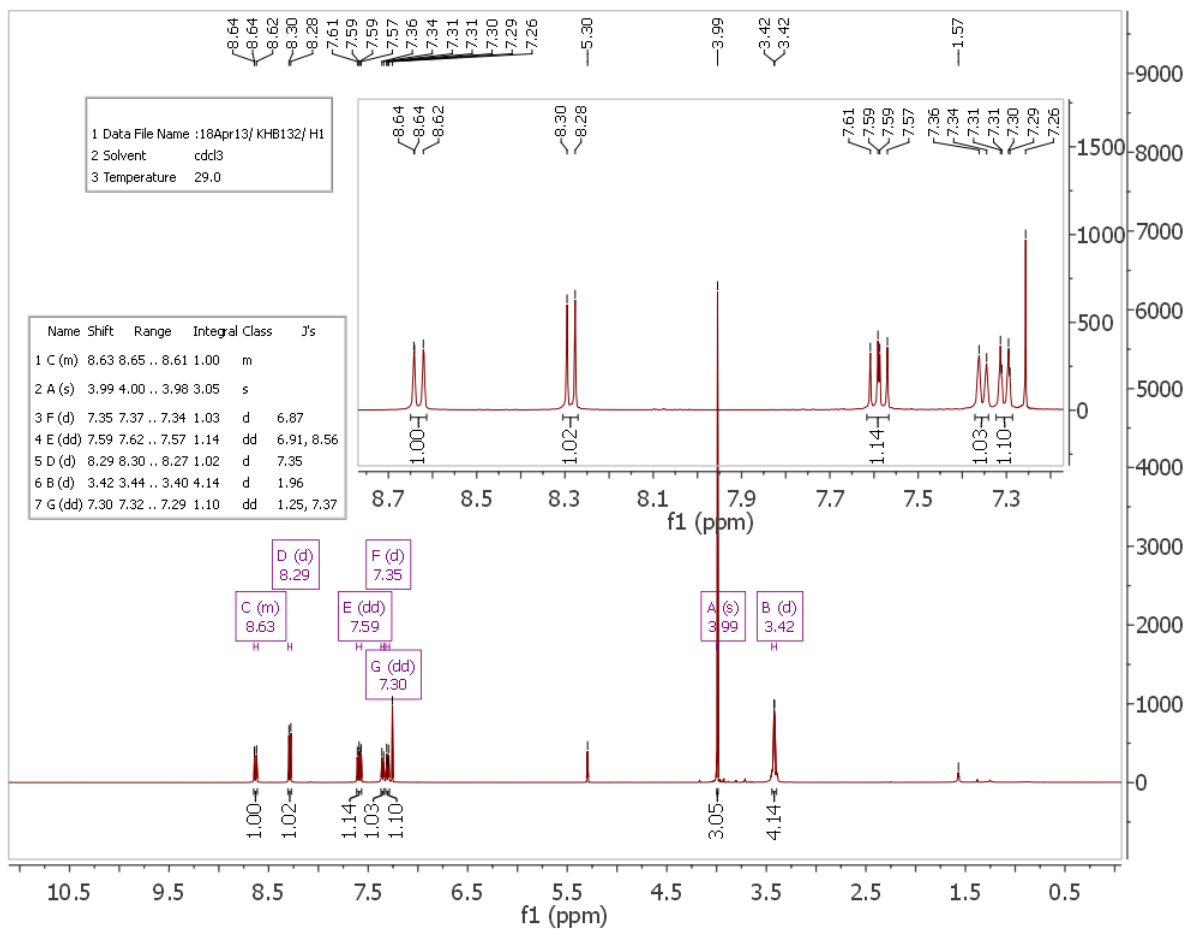

**Supplementary Figure S5.**  $^1\text{H}$  NMR spectrum of 5-methylcarboxylate-1,2-dihydroacenaphthylene (**8**) in  $\text{CDCl}_3$

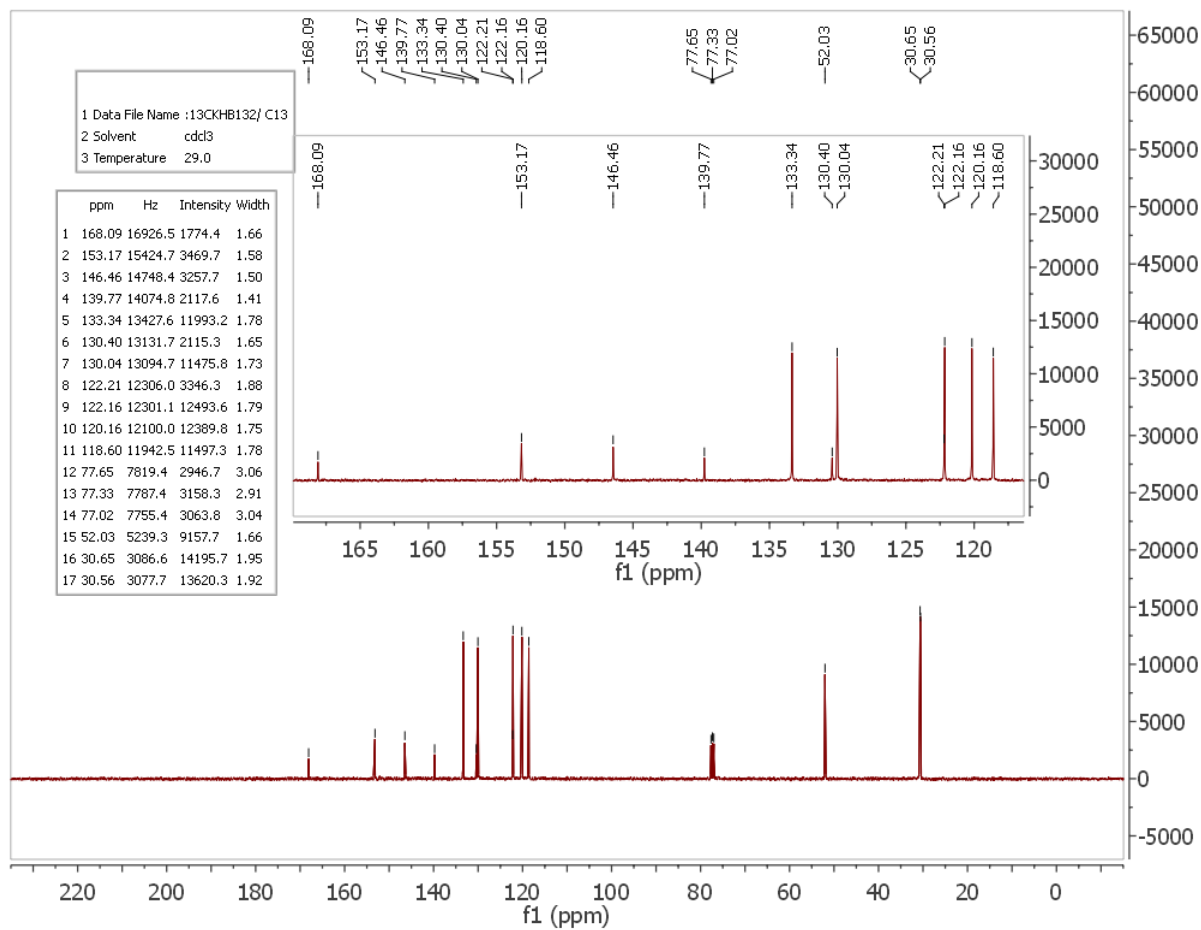

**Supplementary Figure S6.**  $^{13}\text{C}$  NMR spectrum of 5-methylcarboxylate-1,2-dihydroacenaphthylene (**8**) in  $\text{CDCl}_3$

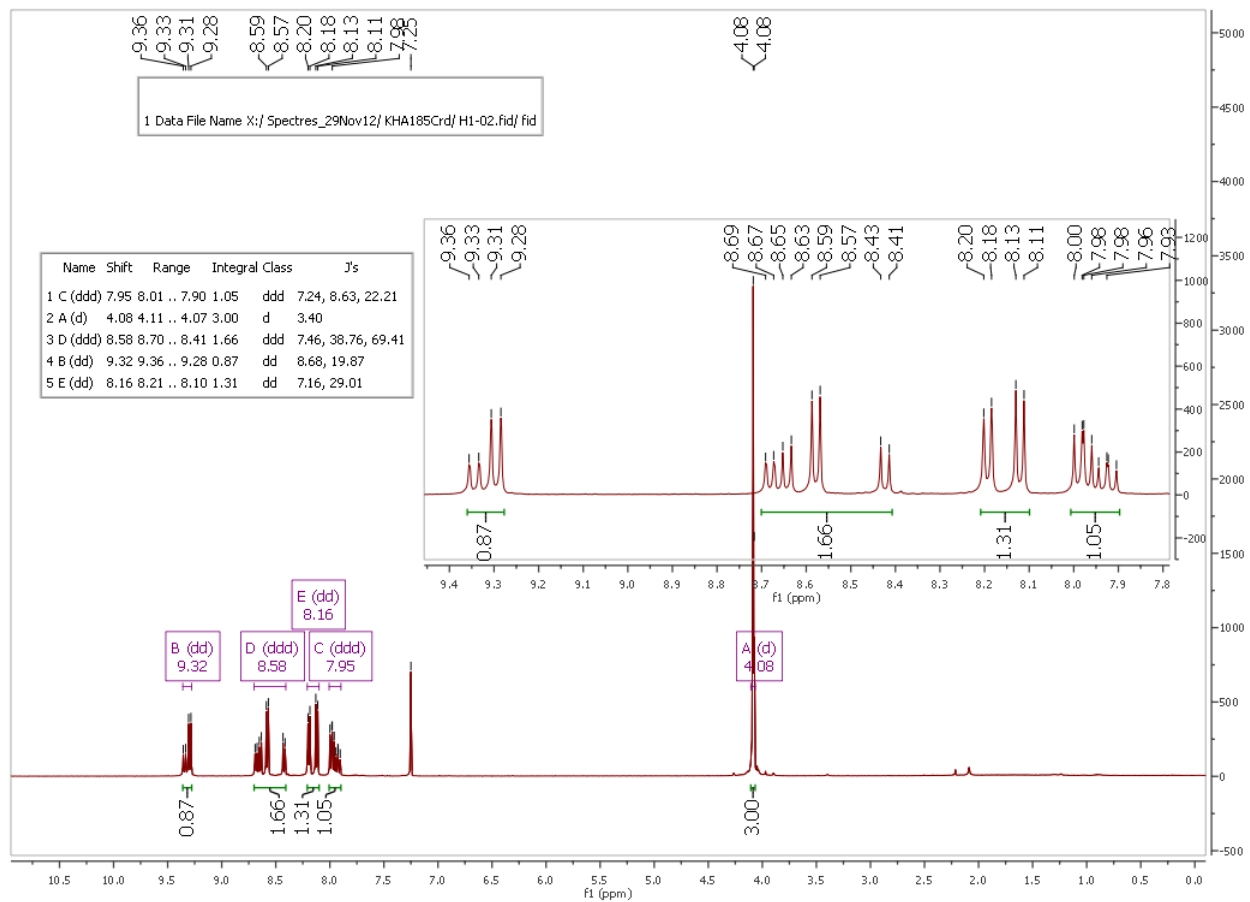

**Supplementary Figure S7.**  $^1\text{H}$  NMR spectrum of 5-methylcarboxylate-1,2-dioxo-1,2-dihydroacenaphthylene (**9**) in  $\text{CDCl}_3$

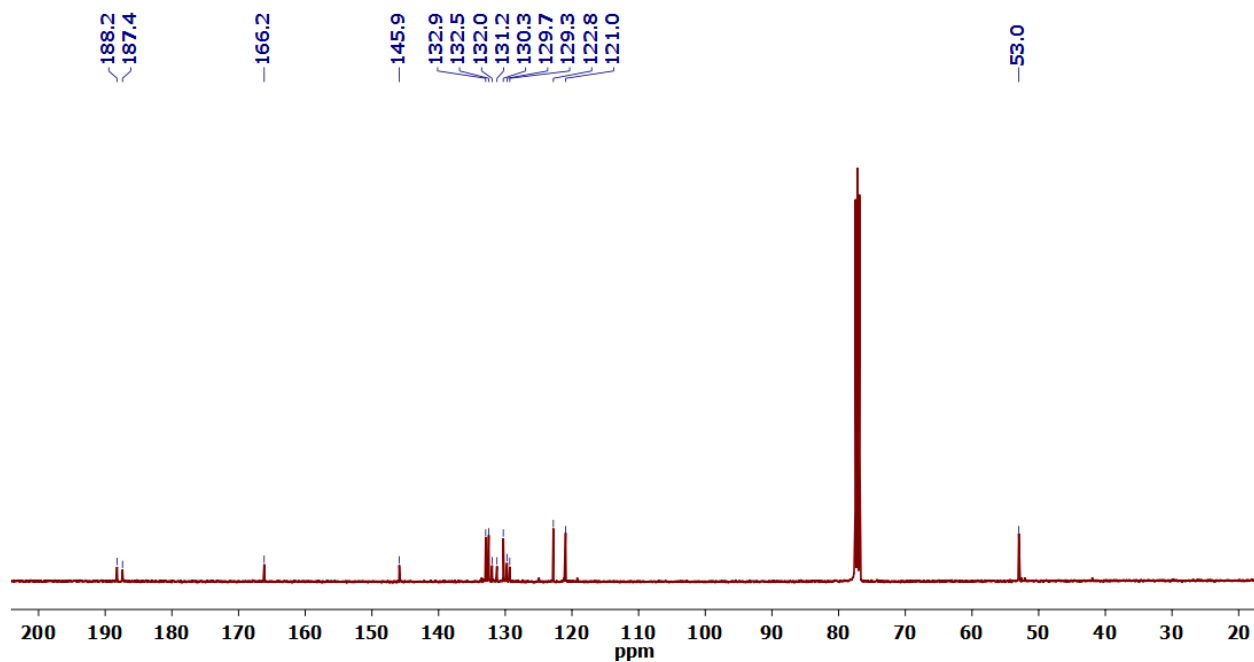

**Supplementary Figure S8.**  $^{13}\text{C}$  NMR spectrum of 5-methylcarboxylate-1,2-dioxo-1,2-dihydroacenaphthylene (**9**) in  $\text{CDCl}_3$

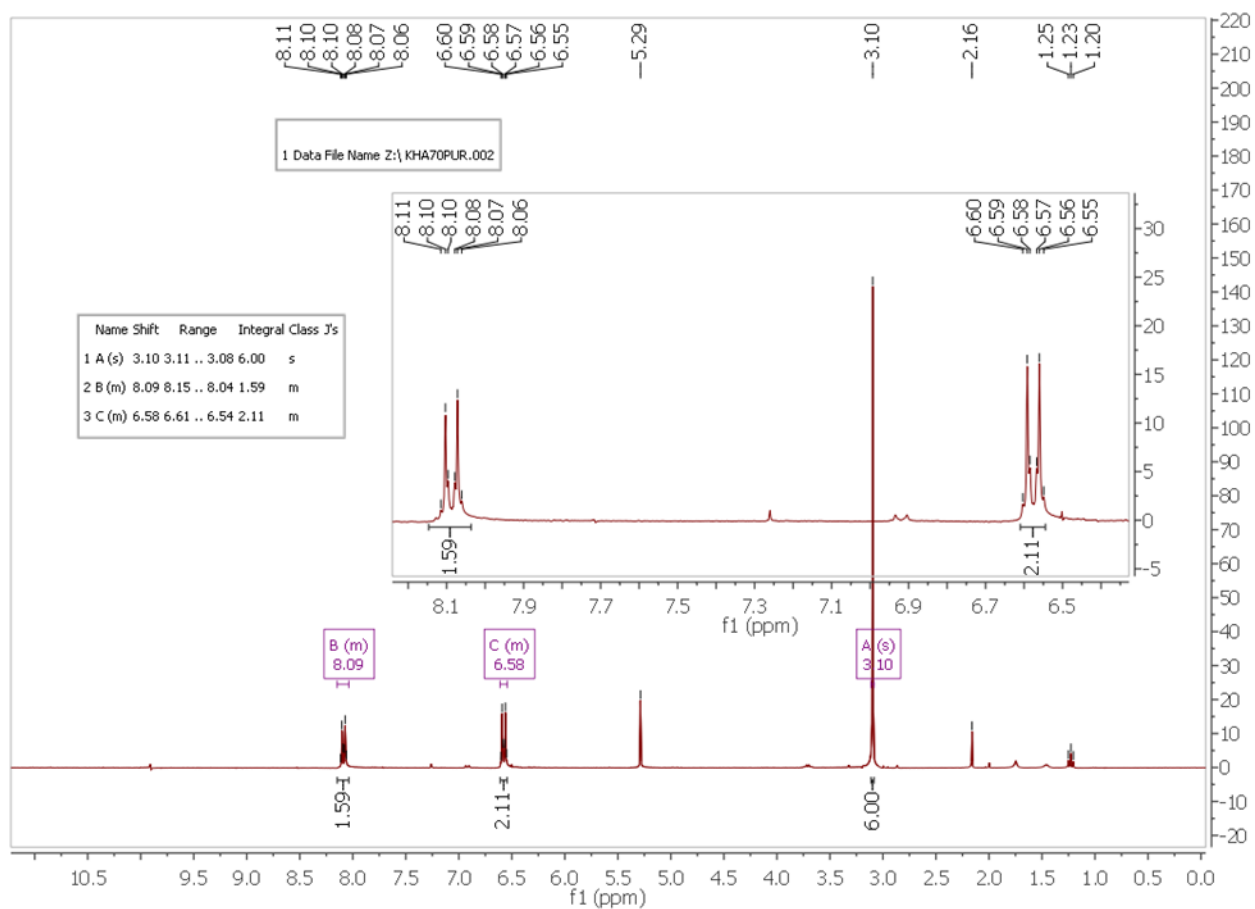

**Supplementary Figure S9.**  $^1\text{H}$  NMR spectrum of *N,N*-dimethylamino-*p*-nitrobenzene (**10**) in  $\text{CDCl}_3$

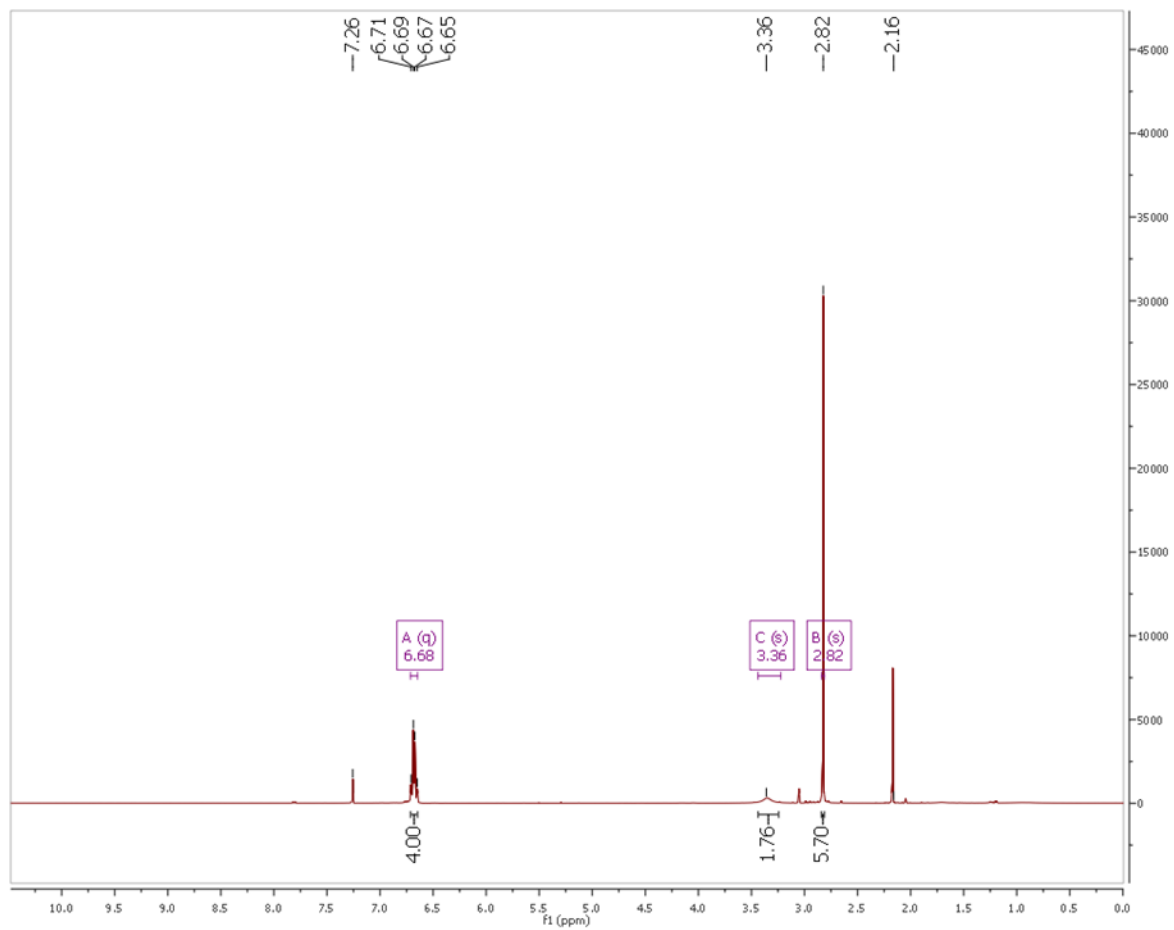

**Supplementary Figure S10.**  $^1\text{H}$  NMR spectrum of *N,N*-dimethylamino-*p*-aniline (**11**) in  $\text{CDCl}_3$



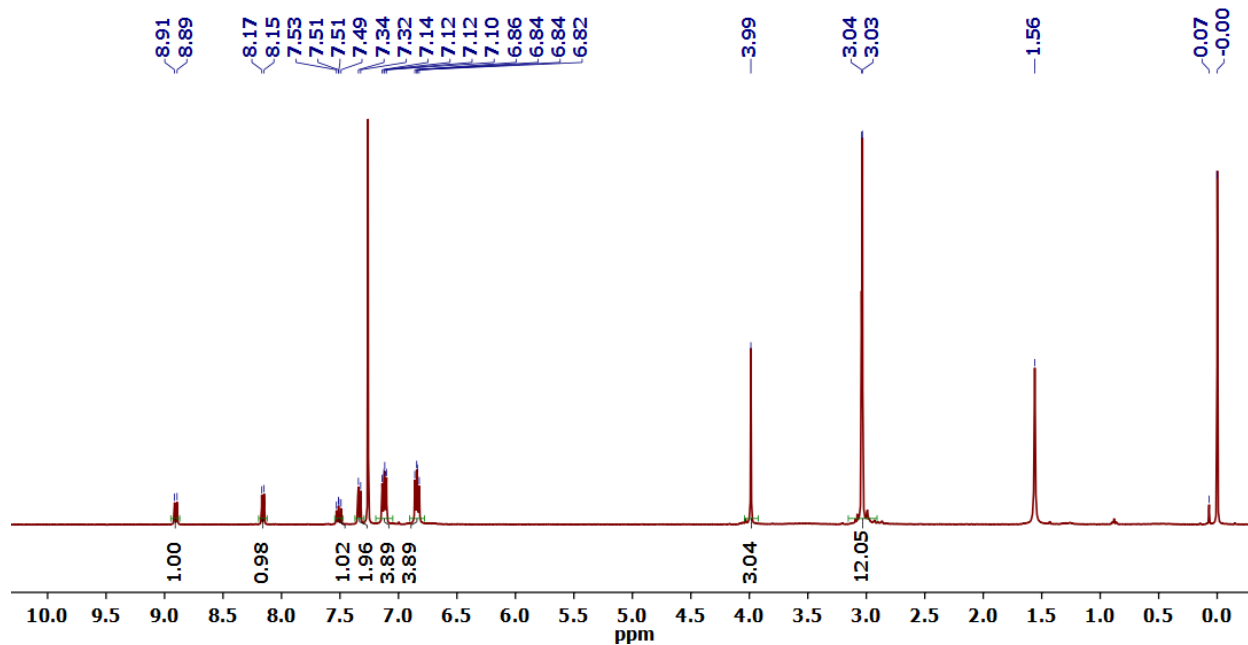

**Supplementary Figure S11.** <sup>1</sup>H NMR spectrum of (1*E*,2*E*)-methyl 1,2-bis((4-(dimethylamino)phenyl)imino)-1,2-dihydroacenaphthylene-5-carboxylate (4-Me<sub>2</sub>NPh-CO<sub>2</sub>MeBIAN) (**12**) in CDCl<sub>3</sub>.

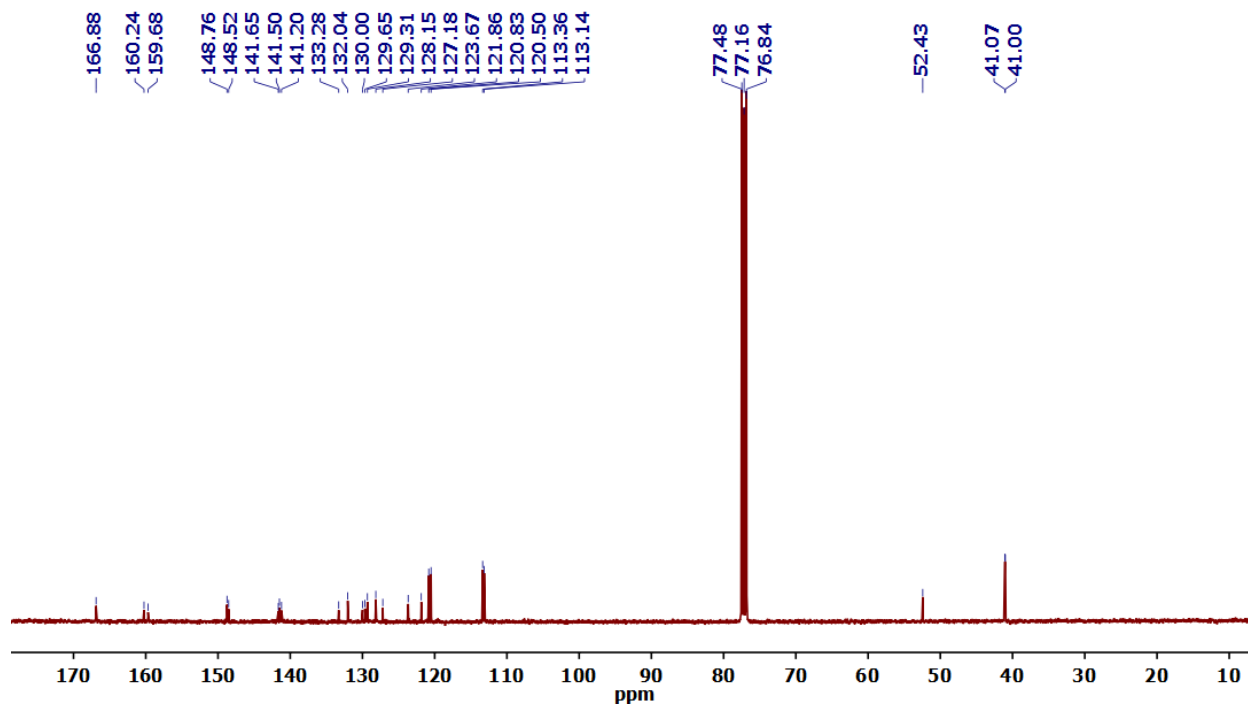

**Supplementary Figure S12.**  $^{13}\text{C}$  NMR spectrum of (1*E*,2*E*)-methyl 1,2-bis((4-(dimethylamino)phenyl)imino)-1,2-dihydroacenaphthylene-5-carboxylate (4-Me<sub>2</sub>NPh-CO<sub>2</sub>MeBIAN) (**12**) in CDCl<sub>3</sub>.

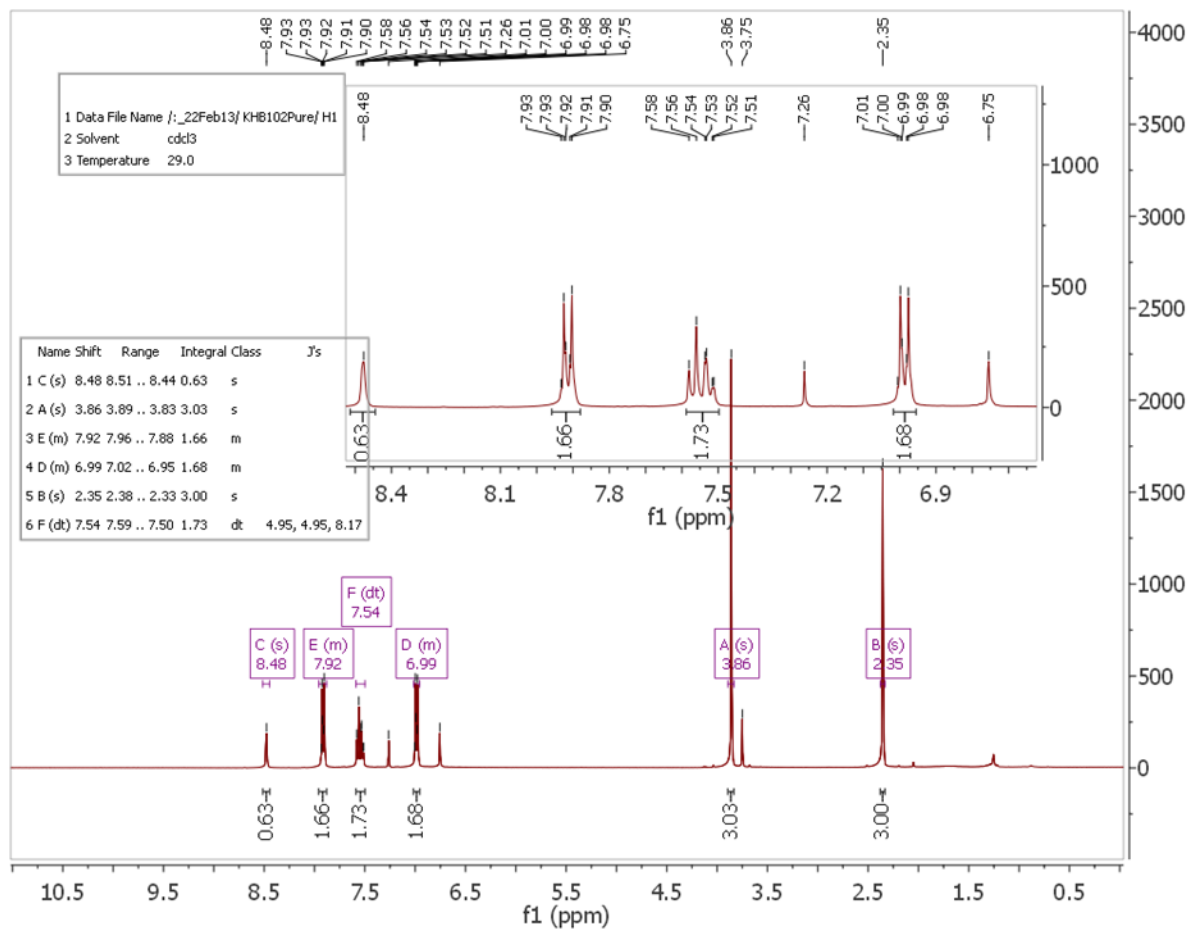

**Supplementary Figure S13.**  $^1\text{H}$  NMR spectrum of 2-(4'-methoxyphenyl)-5-methylpyridine in  $\text{CDCl}_3$

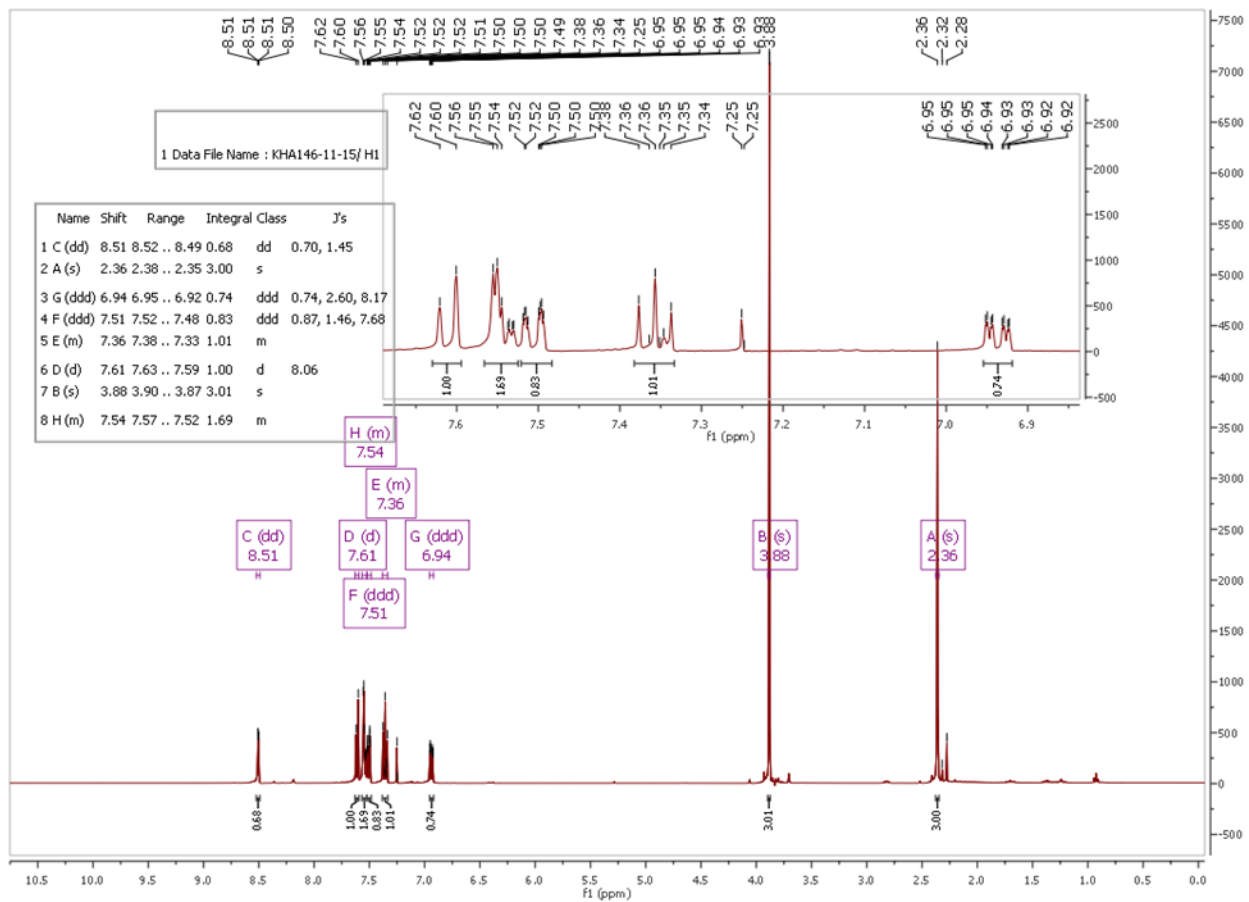

**Supplementary Figure S14.**  $^1\text{H}$  NMR spectrum of 2-(3'-methoxyphenyl)-5-methylpyridine in  $\text{CDCl}_3$

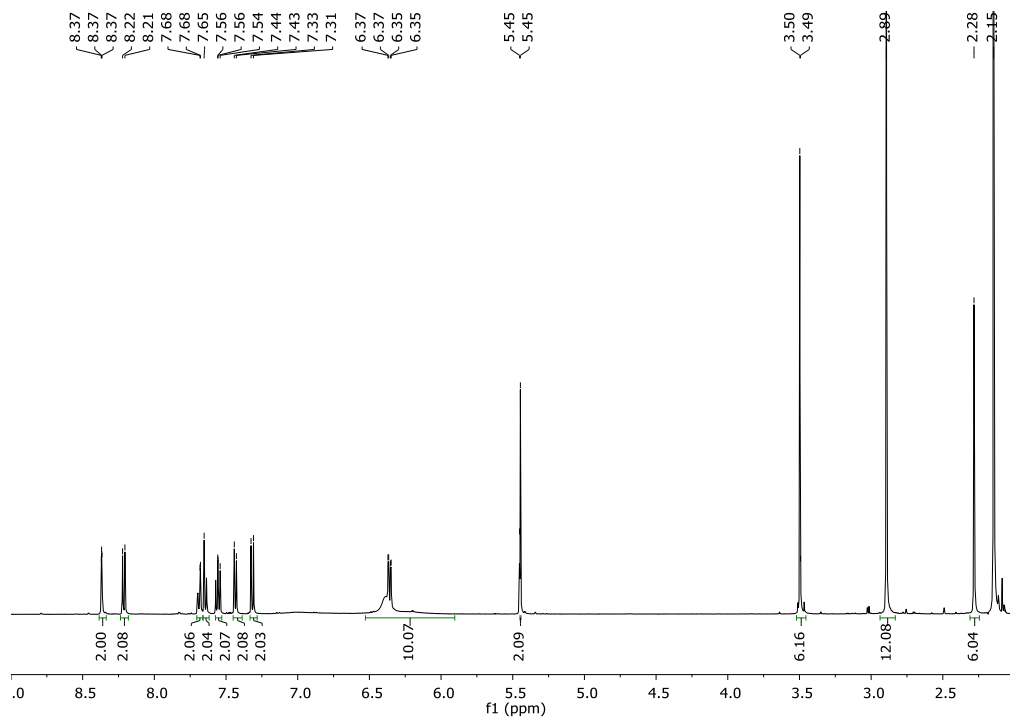

**Supplementary Figure S15.**  $^1\text{H}$  NMR spectrum of  $[\text{Ir}(4\text{-MeO-5-Me-ppy})_2(4\text{-NMe}_2\text{Ph-BIAN})](\text{PF}_6)$  (**2**) in  $\text{CD}_3\text{CN}$ .

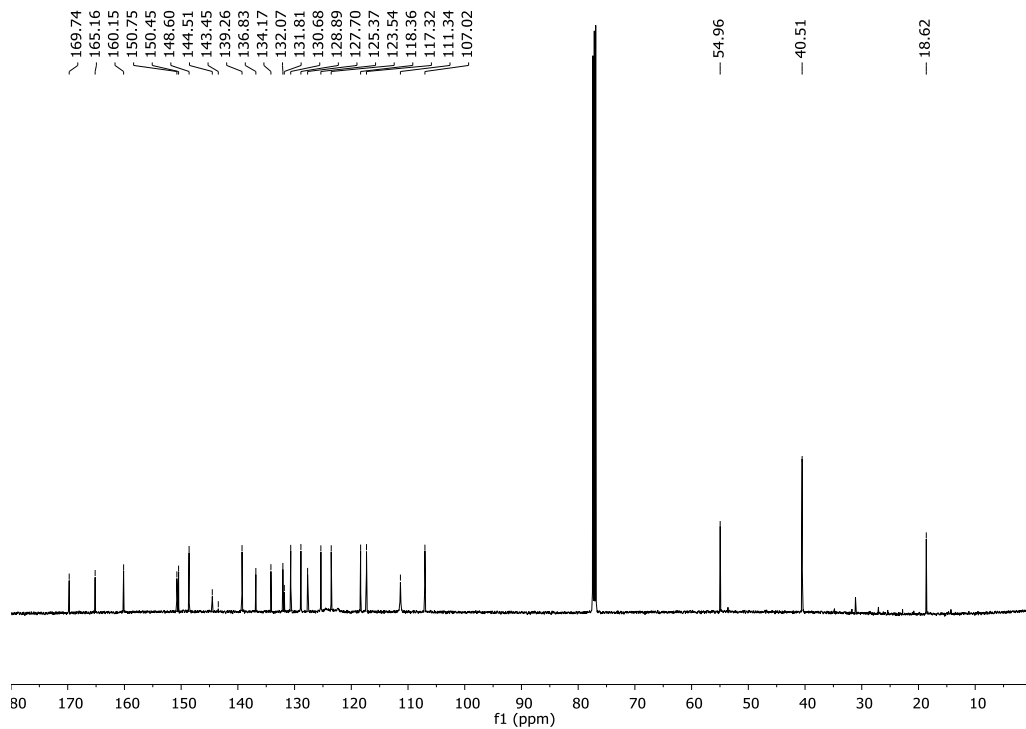

**Supplementary Figure S16.**  $^{13}\text{C}$  NMR spectrum of  $[\text{Ir}(4\text{-MeO-5-Me-ppy})_2(4\text{-NMe}_2\text{Ph-BIAN})](\text{PF}_6)$  (**2**) in  $\text{CDCl}_3$ .

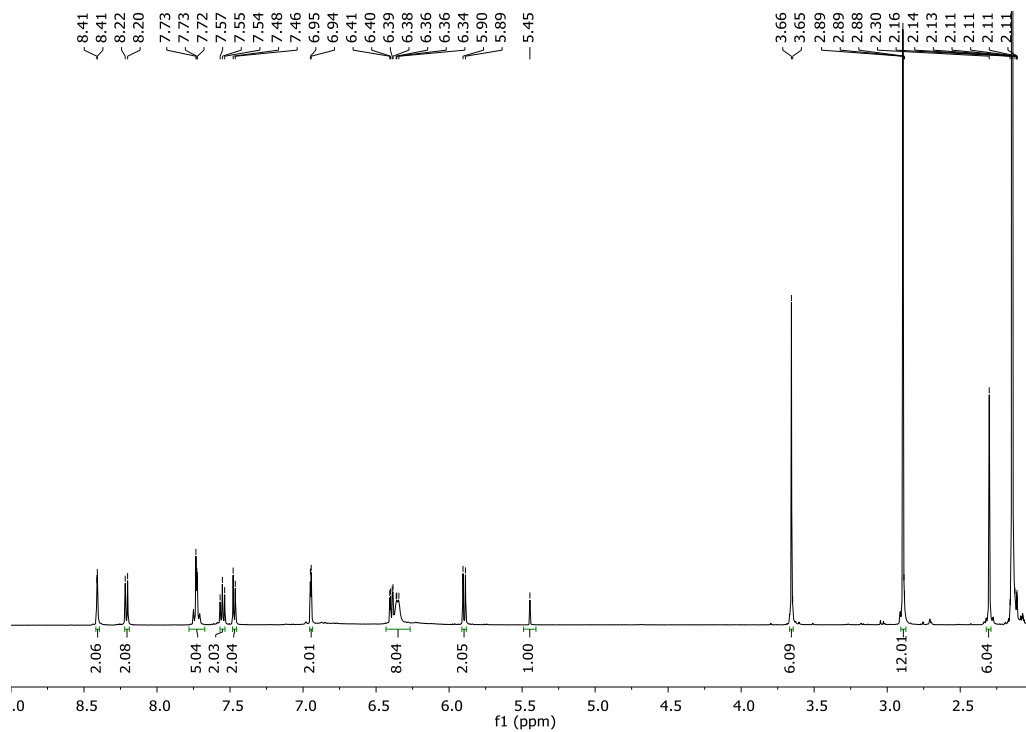

**Supplementary Figure S17.**  $^1\text{H}$  NMR spectrum of  $[\text{Ir}(3\text{-MeO-5-Me-ppy})_2(4\text{-NMe}_2\text{Ph-BIAN})](\text{PF}_6)$  (**3**) in  $\text{CD}_3\text{CN}$ .

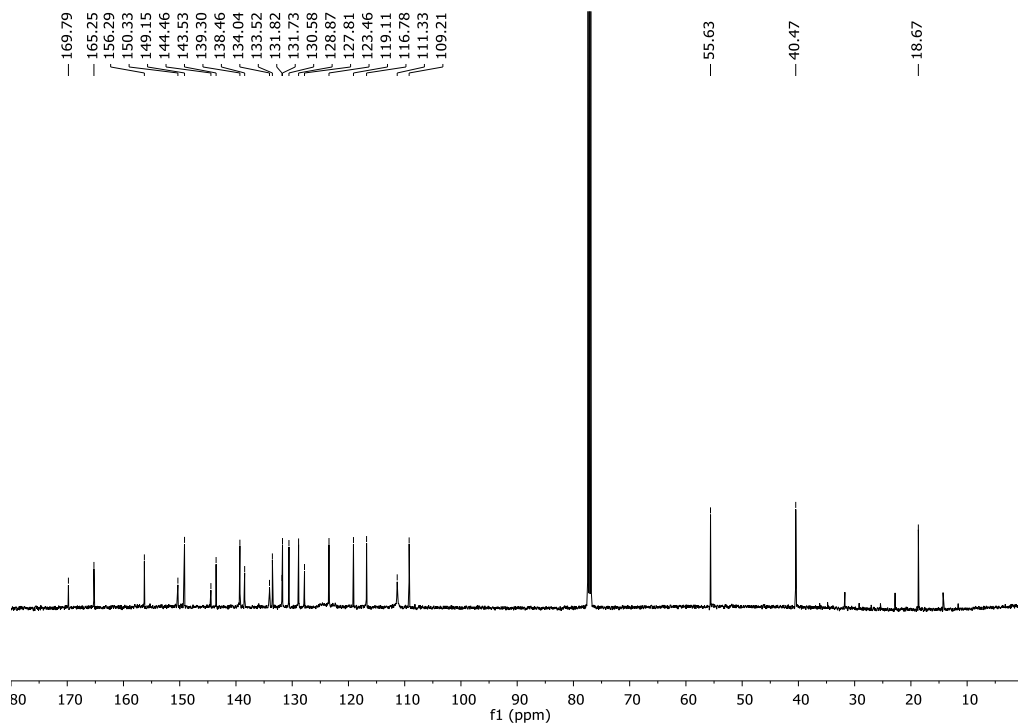

**Supplementary Figure S18.**  $^{13}\text{C}$  NMR spectrum of  $[\text{Ir}(3\text{-MeO-5-Me-ppy})_2(4\text{-NMe}_2\text{Ph-BIAN})](\text{PF}_6)$  (**3**) in  $\text{CDCl}_3$ .

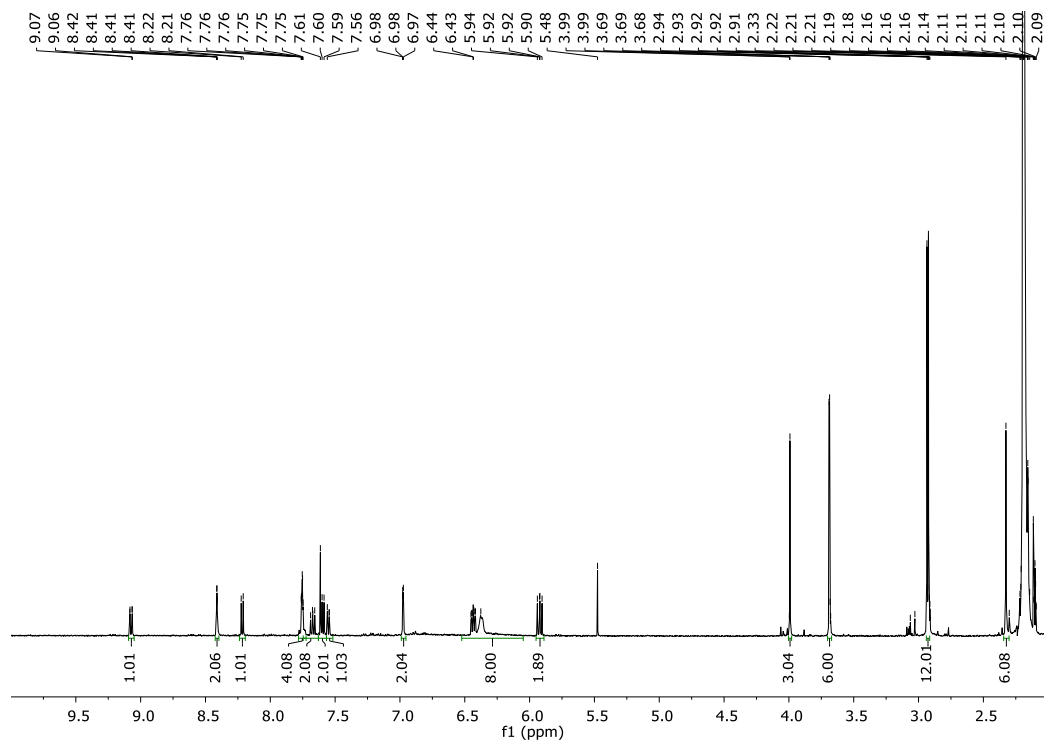

**Supplementary Figure S19.**  $^1\text{H}$  NMR spectrum of  $[\text{Ir}(\text{3-MeO-5-Me-ppy})_2(\text{4-NMe}_2\text{Ph-BIAN-CO}_2\text{Me})](\text{PF}_6)$  (**4**) in  $\text{CD}_3\text{CN}$ .

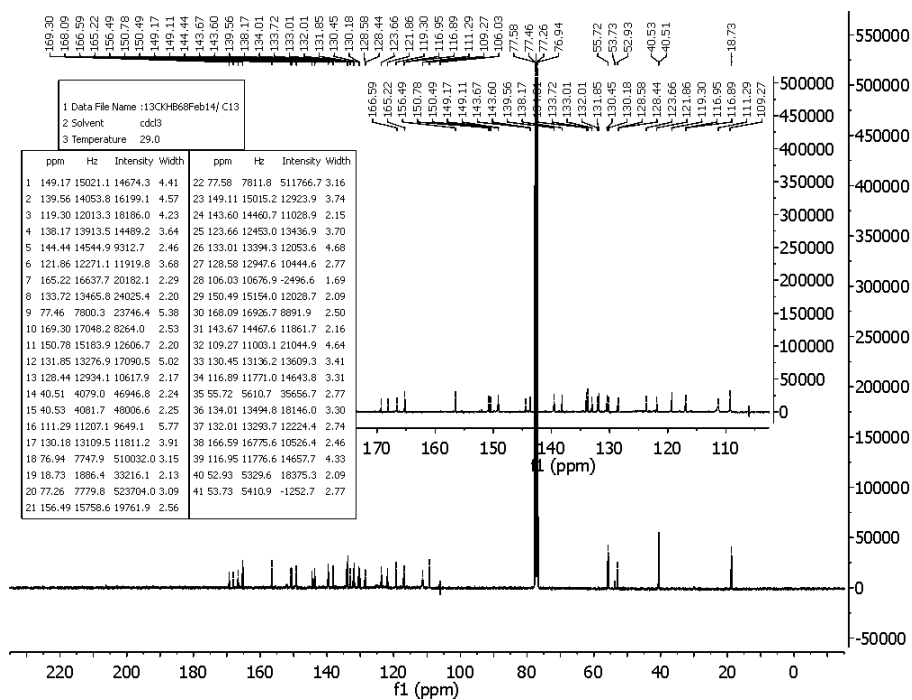

**Supplementary Figure S20.**  $^{13}\text{C}$  NMR spectrum of  $[\text{Ir}(\text{3-MeO-5-Me-ppy})_2(\text{4-NMe}_2\text{Ph-BIAN-CO}_2\text{Me})](\text{PF}_6)$  (**4**) in  $\text{CDCl}_3$ .

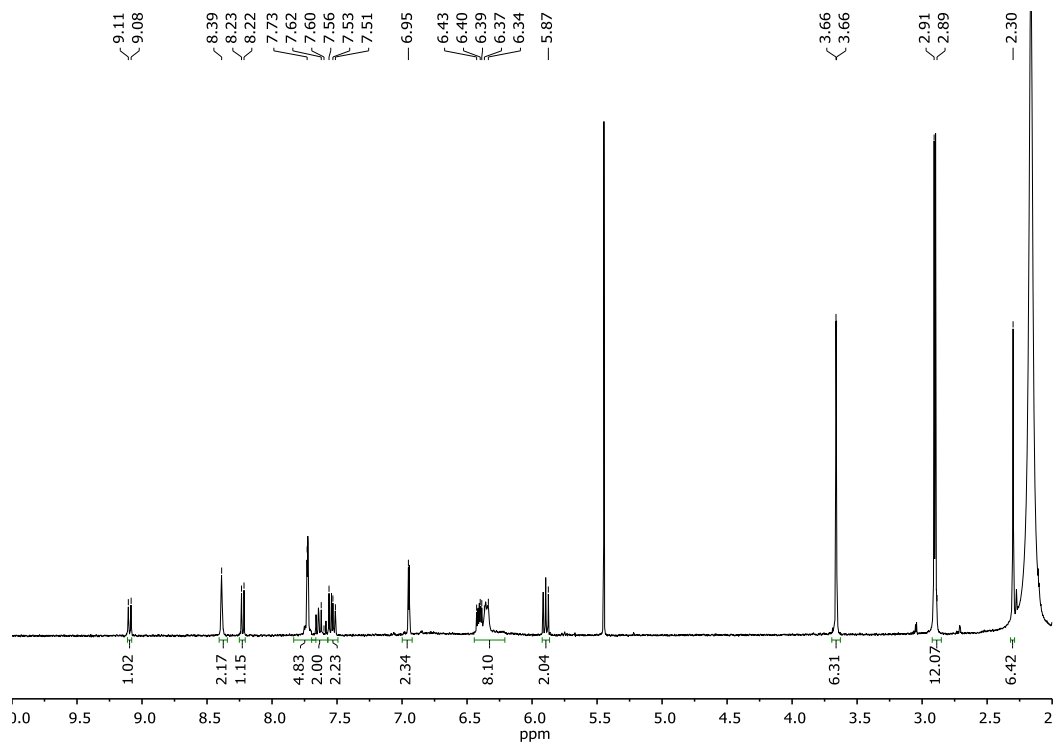

**Supplementary Figure S21.**  $^1\text{H}$  NMR spectrum of  $[\text{Ir}(3\text{-MeO-5-Me-ppy})_2(4\text{-NMe}_2\text{Ph-BIAN-CO}_2\text{H})](\text{PF}_6)$  (**5**) in  $\text{CD}_3\text{CN}$ .

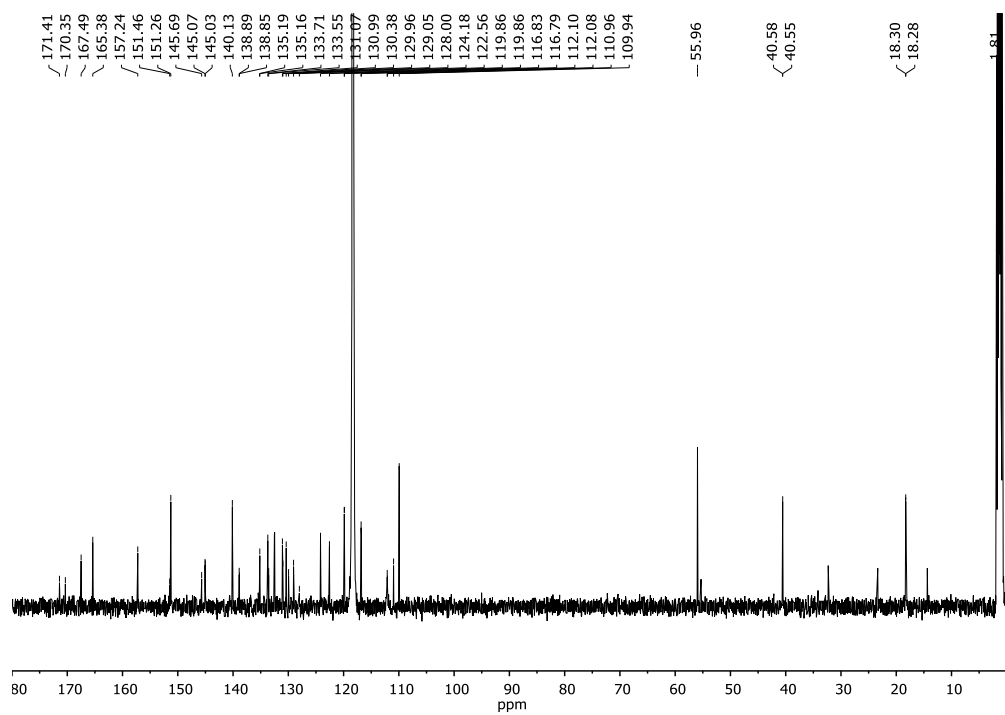

**Supplementary Figure S22.**  $^{13}\text{C}$  NMR spectrum of  $[\text{Ir}(3\text{-MeO-5-Me-ppy})_2(4\text{-NMe}_2\text{Ph-BIAN-CO}_2\text{H})](\text{PF}_6)$  (**5**) in  $\text{CD}_3\text{CN}$ .



## DFT Calculations:

All calculations were performed with the Gaussian09, revision D.01<sup>16</sup> suite of programmes employing the DFT method, the Becke three-parameter hybrid functional,<sup>17</sup> and the Lee-Yang-Parr's gradient-corrected correlation functional (B3LYP).<sup>18</sup> Singlet and triplet ground state geometry optimisations and single point energy calculations for [1]<sup>+</sup>-[5]<sup>+</sup> were carried out at the (R)B3LYP and (U)B3LYP levels, using their respective crystallographic structures as starting points. All elements except iridium were assigned the 6-31G(d,p) basis set.<sup>19</sup> The double- $\zeta$  quality SBKJC VDZ ECP basis set<sup>20</sup> with an effective core potential was employed for the Ir(III) center. Vertical electronic excitations based on (R)B3LYP-optimised geometries were computed for [1]<sup>+</sup>-[5]<sup>+</sup> using the TD-DFT formalism<sup>21,22</sup> in acetonitrile using conductor-like polarisable continuum model (CPCM).<sup>23-25</sup> Vibrational frequency calculations were performed to ensure that the optimised geometries represent the local minima and only positive eigenvalues were obtained. The electronic distribution and localisation of the singlet excited states were visualised using the electron density difference maps (ED-DMs).<sup>26</sup> *GaussSum 2.2* and *Chemission v3.8*<sup>27</sup> were employed to visualise the absorption spectra (simulated using a Gaussian distribution with a full-width at half maximum (fwhm) set to 3000 cm<sup>-1</sup>) and to calculate the fractional contributions of various groups to each molecular orbital. All calculated structures and Kohn-Sham orbitals were visualised with ChemCraft.<sup>28</sup>

**Supplementary Table S1.** Selected transitions from TD-DFT calculations of [1]<sup>+</sup> in the singlet ground state (B3LYP/SBKJC-VDZ[Ir]6-31G\*\*[C,H,N], CPCM (MeCN)).

| State | $\lambda_{\text{abs/nm}}$<br>(TD-DFT) | $\lambda_{\text{abs/nm}}$ ( $\epsilon \times 10^4 \text{ M}^{-1} \text{ cm}^{-1}$ )<br>[expt.] | f (TD-DFT) | Major transition(s)                                 | Character                                                                                       |
|-------|---------------------------------------|------------------------------------------------------------------------------------------------|------------|-----------------------------------------------------|-------------------------------------------------------------------------------------------------|
| 73    | 260                                   | 258 (12.1)                                                                                     | 0.2045     | H-2->L+8 (26%),<br>H-1->L+9 (12%),<br>H->L+10 (45%) | BIAN( $\pi$ ) to ppy( $\pi^*$ ) + BIAN( $\pi$ ) to BIAN( $\pi^*$ ) (almost equal contributions) |
| 42    | 303                                   | 310 (4.02)                                                                                     | 0.1818     | H-6->L+3 (81%)                                      | ppy( $\pi$ ) to ppy( $\pi^*$ ) (major) + Ir(d $\pi$ ) to ppy( $\pi^*$ ) (minor)                 |
| 10    | 420                                   | 396 (1.95)                                                                                     | 0.2426     | H-6->L (55%),<br>H-2->L+1 (33%)                     | ppy( $\pi$ ) to BIAN( $\pi^*$ ) (major) + Ir(d $\pi$ ) to BIAN( $\pi^*$ ) (minor)               |
| 3     | 608                                   | 576 (1.42)                                                                                     | 0.1672     | H-2->L (94%)                                        | ppy( $\pi$ ) to BIAN( $\pi^*$ ) (major) + Ir(d $\pi$ ) to BIAN( $\pi^*$ ) (minor)               |
| 1     | 712                                   | 675 (0.71)                                                                                     | 0.4242     | H->L (94%)                                          | BIAN( $\pi$ ) to BIAN( $\pi^*$ )                                                                |

**Supplementary Table S2.** Selected transitions from TD-DFT calculations of [2]<sup>+</sup> in the singlet ground state (B3LYP/SBKJC-VDZ[Ir]6-31G\*\*[C,H,N,O], CPCM (MeCN)).

| State | $\lambda_{\text{abs}}/\text{nm}$<br>(TD-DFT) | $\lambda_{\text{abs}}/\text{nm}$ ( $\epsilon \times 10^4 \text{ M}^{-1} \text{ cm}^{-1}$ ) [expt.] | f (TD-DFT) | Major transition(s)               | Character                                                                                                                                     |
|-------|----------------------------------------------|----------------------------------------------------------------------------------------------------|------------|-----------------------------------|-----------------------------------------------------------------------------------------------------------------------------------------------|
| 65    | 272                                          | 261 (9.99)                                                                                         | 0.1851     | H-8->L+2 (78%)                    | BIAN( $\pi$ ) to 4-OMeppy( $\pi^*$ ) (major) + Ir( $d\pi$ ) to 4-OMeppy( $\pi^*$ ) (minor)                                                    |
| 39    | 312                                          | 310 (4.62)                                                                                         | 0.2738     | H-5->L+2 (52%),<br>H-4->L+2 (25%) | BIAN( $\pi$ ) to 4-OMeppy( $\pi^*$ ) (major) + Ir( $d\pi$ ) to 4-OMeppy( $\pi^*$ ) (minor) + 4-OMeppy( $\pi$ ) to 4-OMeppy( $\pi^*$ ) (minor) |
| 10    | 424                                          | 390 (2.15)                                                                                         | 0.3694     | H-6->L (87%)                      | Ir( $d\pi$ ) to BIAN( $\pi^*$ ) (major) + 4-OMeppy( $\pi$ ) to BIAN( $\pi^*$ ) (minor)                                                        |
| 4     | 547                                          | 570 (1.43)                                                                                         | 0.0057     | H-3->L (99%)                      | 4-OMeppy( $\pi$ ) to BIAN( $\pi^*$ ) (major) + Ir( $d\pi$ ) to BIAN( $\pi^*$ ) (minor)                                                        |
| 2     | 641                                          | 665 (0.78)                                                                                         | 0.2405     | H-2->L (87%),<br>H->L (11%)       | 4-OMeppy( $\pi$ ) to BIAN( $\pi^*$ ) (major) + Ir( $d\pi$ ) to BIAN( $\pi^*$ ) (minor) + BIAN( $\pi$ ) to BIAN( $\pi^*$ ) (minor)             |

**Supplementary Table S3.** Selected transitions from TD-DFT calculations of [3]<sup>+</sup> in the singlet ground state (B3LYP/SBKJC-VDZ[Ir]6-31G\*\*[C,H,N,O], CPCM (MeCN)).

| State | $\lambda_{\text{abs}}/\text{nm}$<br>(TD-DFT) | $\lambda_{\text{abs}}/\text{nm}$ ( $\epsilon \times 10^4 \text{ M}^{-1} \text{ cm}^{-1}$ ) [expt.] | f (TD-DFT) | Major transition(s)               | Character                                                                                                                                                                               |
|-------|----------------------------------------------|----------------------------------------------------------------------------------------------------|------------|-----------------------------------|-----------------------------------------------------------------------------------------------------------------------------------------------------------------------------------------|
| 74    | 266                                          | 262 (10.8)                                                                                         | 0.3317     | H-5->L+5 (78%)                    | 3-OMeppy( $\pi$ ) to 3-OMeppy( $\pi^*$ ) (major) + Ir( $d\pi$ ) to 3-OMeppy( $\pi^*$ ) (minor)                                                                                          |
| 47    | 297                                          | 312 (3.18)                                                                                         | 0.2662     | H-6->L+2 (48%),<br>H-3->L+5 (20%) | 3-OMeppy( $\pi$ ) to 3-OMeppy( $\pi^*$ ) (major) + BIAN( $\pi$ ) to 3-OMeppy( $\pi^*$ ) (minor)                                                                                         |
| 17    | 400                                          | 409 (1.66)                                                                                         | 0.061      | H-8->L (14%),<br>H-7->L (70%)     | 3-OMeppy( $\pi$ ) to BIAN( $\pi^*$ ) (major) + Ir( $d\pi$ ) to BIAN( $\pi^*$ ) (minor)                                                                                                  |
| 9     | 443                                          | 432 (1.59)                                                                                         | 0.2654     | H-5->L (81%)                      | 3-OMeppy( $\pi$ ) to BIAN( $\pi^*$ ) (major) + Ir( $d\pi$ ) to BIAN( $\pi^*$ ) (minor) + 3-OMeppy( $\pi$ ) to 3-OMeppy( $\pi^*$ ) (minor) + Ir( $d\pi$ ) to 3-OMeppy( $\pi^*$ ) (minor) |
| 3     | 601                                          | 585 (1.11)                                                                                         | 0.0517     | H-2->L (95%),                     | BIAN( $\pi$ ) to BIAN( $\pi^*$ ) (major) + 3-OMeppy( $\pi$ ) to 3-OMeppy( $\pi^*$ ) (major) + BIAN( $\pi$ ) to 3-OMeppy( $\pi^*$ ) (minor)                                              |

**Supplementary Table S4.** Selected transitions from TD-DFT calculations of [4]<sup>+</sup> in the singlet ground state (B3LYP/SBKJC-VDZ[Ir]6-31G\*\*[C,H,N,O], CPCM (MeCN)).

| State | $\lambda_{\text{abs}}/\text{nm}$<br>(TD-DFT) | $\lambda_{\text{abs}}/\text{nm}$ ( $\epsilon \times 10^4 \text{ M}^{-1}\text{cm}^{-1}$ ) [expt.] | f (TD-DFT) | Major transition(s)                                  | Character                                                                                                                                     |
|-------|----------------------------------------------|--------------------------------------------------------------------------------------------------|------------|------------------------------------------------------|-----------------------------------------------------------------------------------------------------------------------------------------------|
| 79    | 267                                          | 264 (11.2)                                                                                       | 0.3659     | H-5->L+5 (68%)                                       | 3-OMeppy( $\pi$ ) to 3-OMeppy( $\pi^*$ ) (major) + Ir(d $\pi$ ) to 3-OMeppy( $\pi^*$ ) (minor)                                                |
| 46    | 306                                          | 309 (4.48)                                                                                       | 0.0861     | H-7->L+3 (12%),<br>H-5->L+3 (65%),<br>H-4->L+3 (10%) | 3-OMeppy( $\pi$ ) to 3-OMeppy( $\pi^*$ ) (major) + Ir(d $\pi$ ) to 3-OMeppy( $\pi^*$ ) (minor) + BIAN( $\pi$ ) to 3-OMeppy( $\pi^*$ ) (minor) |
| 11    | 435                                          | 416 (1.85)                                                                                       | 0.0886     | H-1->L+2 (94%)                                       | 3-OMeppy( $\pi$ ) to 3-OMeppy( $\pi^*$ ) (major) + Ir(d $\pi$ ) to 3-OMeppy( $\pi^*$ ) (minor)                                                |
| 4     | 578                                          | 590 (1.57)                                                                                       | 0.1237     | H->L+1 (90%)                                         | BIAN( $\pi$ ) to BIAN( $\pi^*$ )                                                                                                              |

**Supplementary Table S5.** Selected transitions from TD-DFT calculations of [5]<sup>+</sup> in the singlet ground state (B3LYP/SBKJC-VDZ[Ir]6-31G\*\*[C,H,N,O], CPCM (MeCN)).

| State | $\lambda_{\text{abs}}/\text{nm}$<br>(TD-DFT) | $\lambda_{\text{abs}}/\text{nm}$ ( $\epsilon \times 10^4 \text{ M}^{-1}\text{cm}^{-1}$ ) [expt.] | f (TD-DFT) | Major transition(s)                                  | Character                                                                                                                                                                               |
|-------|----------------------------------------------|--------------------------------------------------------------------------------------------------|------------|------------------------------------------------------|-----------------------------------------------------------------------------------------------------------------------------------------------------------------------------------------|
| 78    | 267                                          | 262 (10.2)                                                                                       | 0.3906     | H-5->L+5 (72%)                                       | 3-OMeppy( $\pi$ ) to 3-OMeppy( $\pi^*$ ) (major) + Ir(d $\pi$ ) to 3-OMeppy( $\pi^*$ ) (minor)                                                                                          |
| 55    | 295                                          | 310 (3.37)                                                                                       | 0.2366     | H-7->L+2 (31%),<br>H-1->L+7 (16%),<br>H-1->L+8 (10%) | 3-OMeppy( $\pi$ ) to 3-OMeppy( $\pi^*$ ) (major) + Ir(d $\pi$ ) to 3-OMeppy( $\pi^*$ ) (minor) + 3-OMeppy( $\pi$ ) to BIAN( $\pi^*$ ) (minor) + Ir(d $\pi$ ) to BIAN( $\pi^*$ ) (minor) |
| 11    | 435                                          | 427 (1.82)                                                                                       | 0.0898     | H-1->L+2 (94%)                                       | 3-OMeppy( $\pi$ ) to 3-OMeppy( $\pi^*$ ) (major) + Ir(d $\pi$ ) to 3-OMeppy( $\pi^*$ ) (minor)                                                                                          |
| 4     | 587                                          | 604 (1.41)                                                                                       | 0.1402     | H->L+1 (96%)                                         | BIAN( $\pi$ ) to BIAN( $\pi^*$ )                                                                                                                                                        |

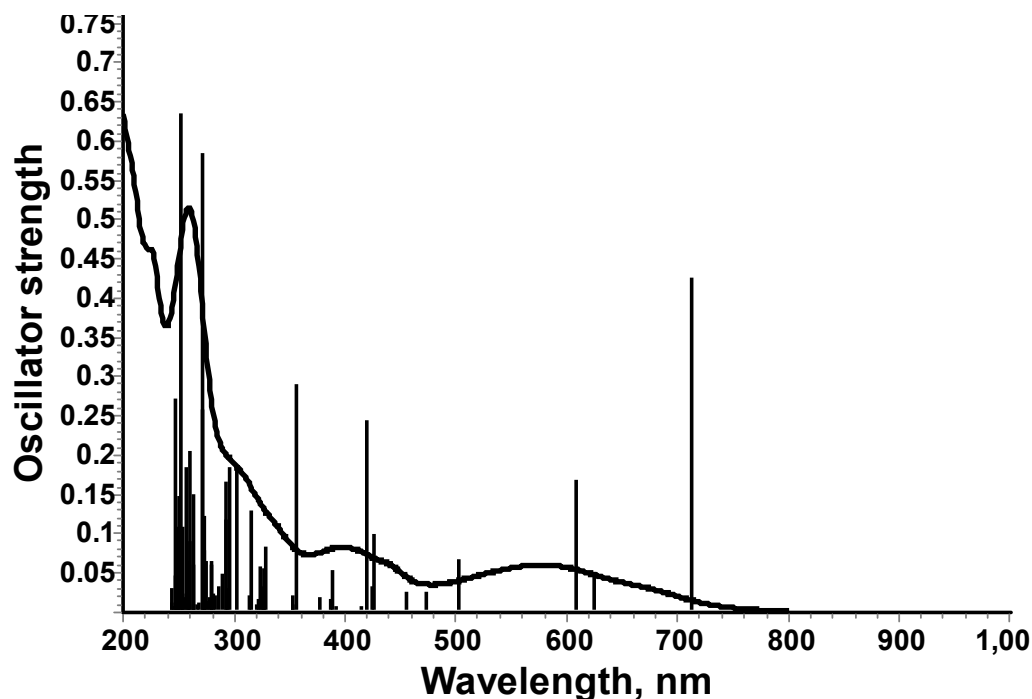

**Supplementary Figure S23.** Overlay of experimental UV-vis absorption spectra (curved line) of **1** with their predicted transitions (vertical bars) calculated by singlet TD-DFT at room temperature in MeCN.

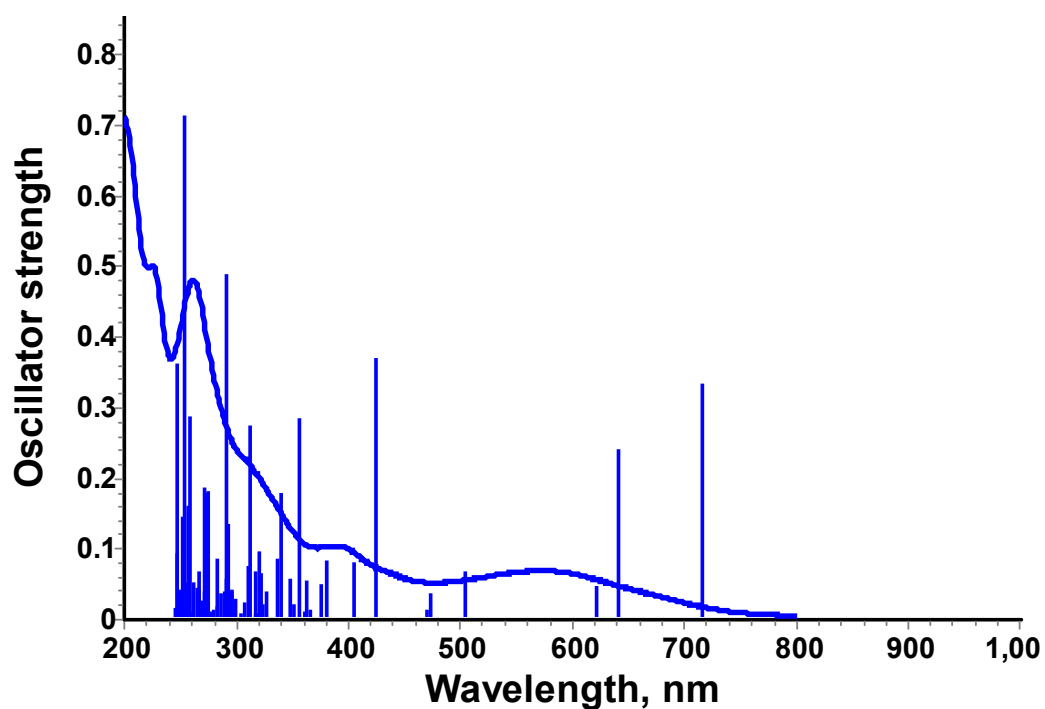

**Supplementary Figure S24.** Overlay of experimental UV-vis absorption spectra (curved line) of **2** with their predicted transitions (vertical bars) calculated by singlet TD-DFT at room temperature in MeCN.

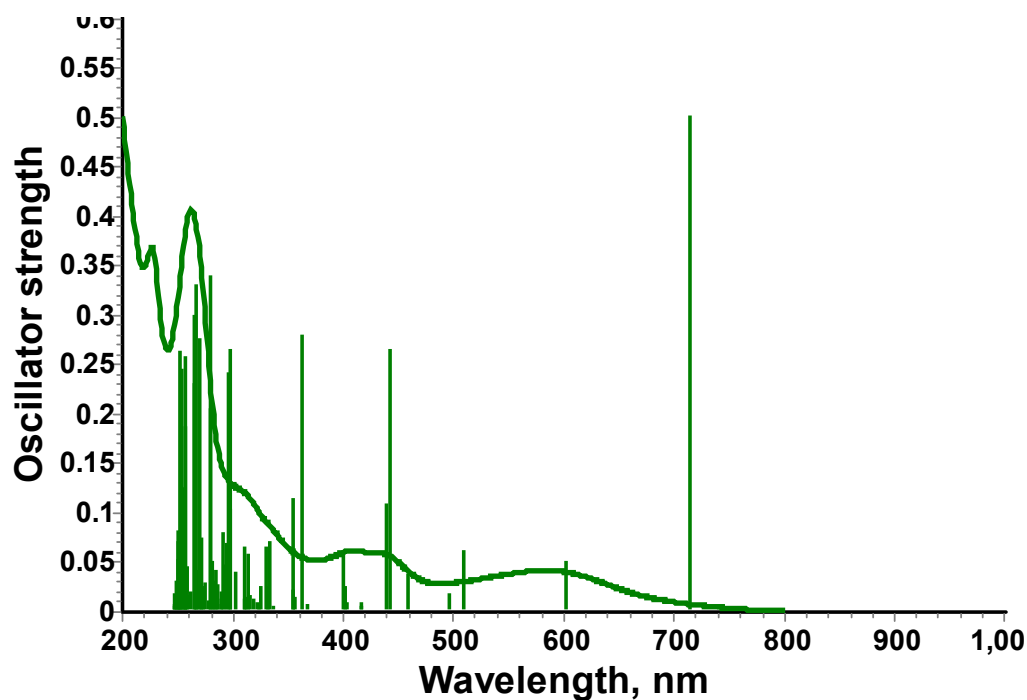

**Supplementary Figure S25.** Overlay of experimental UV-vis absorption spectra (curved line) of **3** with their predicted transitions (vertical bars) calculated by singlet TD-DFT at room temperature in MeCN.

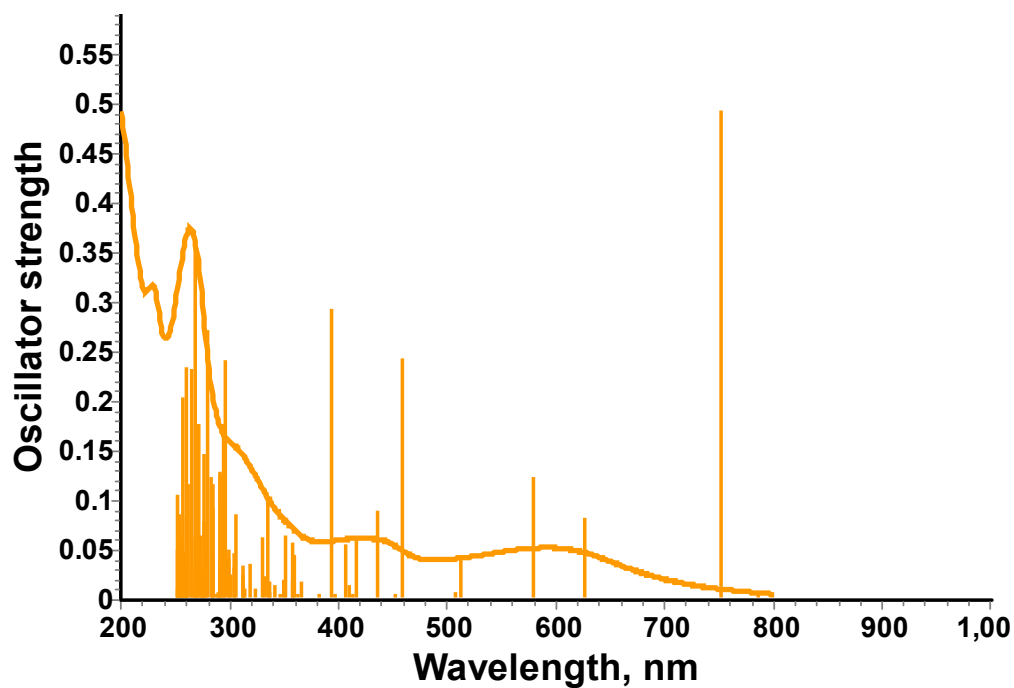

**Supplementary Figure S26.** Overlay of experimental UV-vis absorption spectra (curved line) of **4** with their predicted transitions (vertical bars) calculated by singlet TD-DFT at room temperature in MeCN.

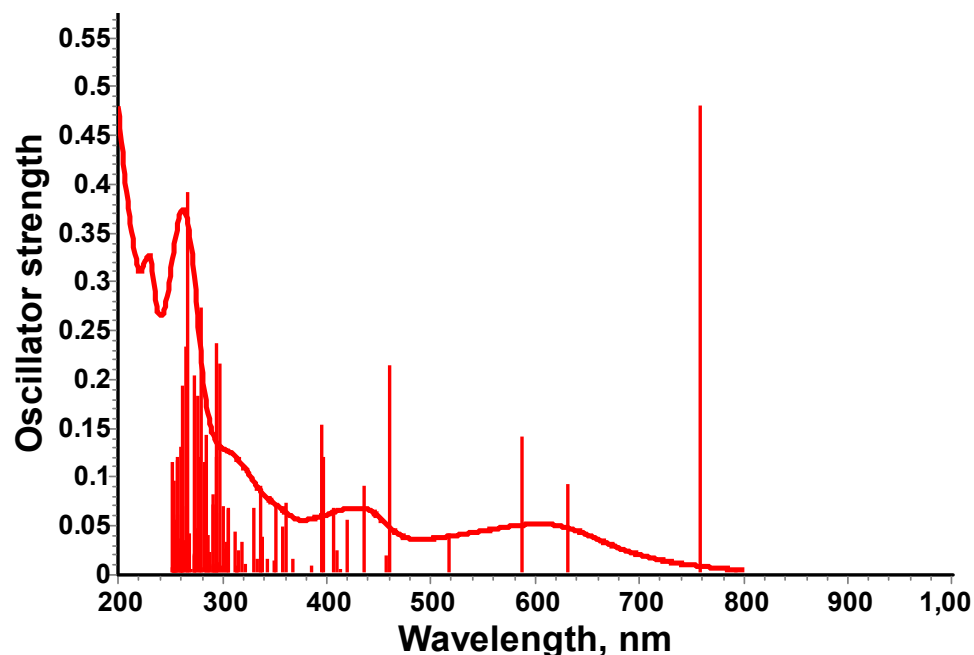

**Supplementary Figure S27.** Overlay of experimental UV-vis absorption spectra (curved line) of **5** with their predicted transitions (vertical bars) calculated by singlet TD-DFT at room temperature in MeCN.

**Supplementary Table S6.** Optimised atomic coordinates obtained from DFT calculations of **[1]<sup>+</sup>**.

| Center Number | Atomic Number | Atomic Type | Coordinates (Angstroms) |           |           |
|---------------|---------------|-------------|-------------------------|-----------|-----------|
|               |               |             | X                       | Y         | Z         |
| 1             | 77            | 0           | -0.000016               | -0.877141 | 0.000039  |
| 2             | 7             | 0           | 1.342294                | 0.897630  | -0.264978 |
| 3             | 1             | 0           | 1.130262                | -2.869833 | -2.322171 |
| 4             | 6             | 0           | 1.669443                | -3.078700 | -1.402803 |
| 5             | 6             | 0           | 1.371194                | -2.355783 | -0.236752 |
| 6             | 6             | 0           | 2.656583                | -4.067489 | -1.412024 |
| 7             | 6             | 0           | 2.100119                | -2.681816 | 0.938599  |
| 8             | 6             | 0           | 3.374137                | -4.367707 | -0.248366 |
| 9             | 6             | 0           | 1.746062                | -1.913724 | 2.134104  |
| 10            | 6             | 0           | 3.094127                | -3.675356 | 0.925824  |
| 11            | 1             | 0           | 4.141324                | -5.135955 | -0.257902 |
| 12            | 6             | 0           | 2.322572                | -2.057576 | 3.404100  |
| 13            | 6             | 0           | 0.351057                | -0.211866 | 2.964987  |
| 14            | 6             | 0           | 1.896067                | -1.261698 | 4.459300  |
| 15            | 1             | 0           | 3.103599                | -2.792113 | 3.557908  |
| 16            | 6             | 0           | 0.891069                | -0.316487 | 4.238403  |
| 17            | 1             | 0           | -0.428173               | 0.504306  | 2.737024  |
| 18            | 1             | 0           | 2.341928                | -1.374311 | 5.442220  |

|    |   |   |           |           |           |
|----|---|---|-----------|-----------|-----------|
| 19 | 7 | 0 | 0.757195  | -0.988910 | 1.941156  |
| 20 | 1 | 0 | -1.130588 | -2.869287 | 2.322533  |
| 21 | 6 | 0 | -1.669766 | -3.078243 | 1.403185  |
| 22 | 6 | 0 | -1.371391 | -2.355570 | 0.237021  |
| 23 | 6 | 0 | -2.657032 | -4.066909 | 1.412538  |
| 24 | 6 | 0 | -2.100316 | -2.681703 | -0.938304 |
| 25 | 6 | 0 | -3.374582 | -4.367235 | 0.248907  |
| 26 | 6 | 0 | -3.094448 | -3.675116 | -0.925392 |
| 27 | 6 | 0 | -1.746146 | -1.913833 | -2.133918 |
| 28 | 1 | 0 | -4.141865 | -5.135385 | 0.258546  |
| 29 | 6 | 0 | -2.322630 | -2.057812 | -3.403909 |
| 30 | 6 | 0 | -0.350971 | -0.212206 | -2.964992 |
| 31 | 6 | 0 | -1.896022 | -1.262115 | -4.459207 |
| 32 | 1 | 0 | -3.103721 | -2.792297 | -3.557641 |
| 33 | 6 | 0 | -0.890954 | -0.316957 | -4.238411 |
| 34 | 1 | 0 | 0.428301  | 0.503942  | -2.737093 |
| 35 | 1 | 0 | -2.341865 | -1.374827 | -5.442125 |
| 36 | 7 | 0 | -0.757201 | -0.989079 | -1.941072 |
| 37 | 1 | 0 | -2.867739 | -4.607779 | 2.331809  |
| 38 | 1 | 0 | -3.650670 | -3.913552 | -1.827334 |
| 39 | 1 | 0 | -0.528856 | 0.327391  | -5.030801 |
| 40 | 1 | 0 | 0.529043  | 0.327994  | 5.030718  |
| 41 | 1 | 0 | 3.650352  | -3.913707 | 1.827788  |
| 42 | 1 | 0 | 2.867191  | -4.608546 | -2.331208 |
| 43 | 7 | 0 | -1.342108 | 0.897602  | 0.264911  |
| 44 | 6 | 0 | 2.758072  | 0.811703  | -0.323770 |
| 45 | 6 | 0 | 3.382050  | 0.096529  | -1.357144 |
| 46 | 6 | 0 | 3.563779  | 1.356703  | 0.688813  |
| 47 | 6 | 0 | 4.763037  | -0.016340 | -1.416338 |
| 48 | 1 | 0 | 2.778272  | -0.360306 | -2.132882 |
| 49 | 6 | 0 | 4.944672  | 1.223359  | 0.656960  |
| 50 | 1 | 0 | 3.098440  | 1.869417  | 1.524874  |
| 51 | 6 | 0 | 5.592125  | 0.549526  | -0.411961 |
| 52 | 1 | 0 | 5.200945  | -0.557228 | -2.245561 |
| 53 | 1 | 0 | 5.521871  | 1.635891  | 1.474644  |
| 54 | 6 | 0 | -2.757939 | 0.811791  | 0.323655  |
| 55 | 6 | 0 | -3.382057 | 0.097033  | 1.357211  |
| 56 | 6 | 0 | -3.563478 | 1.356506  | -0.689200 |
| 57 | 6 | 0 | -4.763067 | -0.015729 | 1.416285  |
| 58 | 1 | 0 | -2.778397 | -0.359573 | 2.133175  |
| 59 | 6 | 0 | -4.944392 | 1.223276  | -0.657444 |
| 60 | 1 | 0 | -3.098002 | 1.868920  | -1.525367 |
| 61 | 6 | 0 | -5.592004 | 0.549860  | 0.411636  |
| 62 | 1 | 0 | -5.201098 | -0.556290 | 2.245655  |
| 63 | 1 | 0 | -5.521472 | 1.635547  | -1.475342 |
| 64 | 6 | 0 | 0.737893  | 2.043325  | -0.118735 |

|    |   |   |           |           |           |
|----|---|---|-----------|-----------|-----------|
| 65 | 6 | 0 | 1.172488  | 3.449091  | -0.202568 |
| 66 | 6 | 0 | 0.000063  | 4.228746  | 0.000046  |
| 67 | 6 | 0 | 2.366229  | 4.101644  | -0.464541 |
| 68 | 6 | 0 | -1.172337 | 3.449053  | 0.202634  |
| 69 | 6 | 0 | 0.000034  | 5.638923  | 0.000051  |
| 70 | 6 | 0 | 2.378430  | 5.519630  | -0.500618 |
| 71 | 1 | 0 | 3.289018  | 3.559967  | -0.627752 |
| 72 | 6 | 0 | -2.366117 | 4.101551  | 0.464579  |
| 73 | 6 | 0 | -1.243183 | 6.276355  | 0.264739  |
| 74 | 6 | 0 | 1.243225  | 6.276410  | -0.264641 |
| 75 | 1 | 0 | 3.318211  | 6.022226  | -0.706546 |
| 76 | 6 | 0 | -2.378369 | 5.519533  | 0.500681  |
| 77 | 1 | 0 | -3.288885 | 3.559828  | 0.627751  |
| 78 | 1 | 0 | -1.297487 | 7.361004  | 0.281063  |
| 79 | 1 | 0 | 1.297486  | 7.361061  | -0.280951 |
| 80 | 1 | 0 | -3.318171 | 6.022098  | 0.706592  |
| 81 | 6 | 0 | -0.737703 | 2.043307  | 0.118761  |
| 82 | 6 | 0 | 7.590160  | -0.338741 | -1.524396 |
| 83 | 1 | 0 | 7.346812  | 0.061226  | -2.516236 |
| 84 | 1 | 0 | 8.672113  | -0.296290 | -1.403300 |
| 85 | 1 | 0 | 7.284306  | -1.393379 | -1.498345 |
| 86 | 6 | 0 | -7.780067 | 0.970840  | -0.614969 |
| 87 | 1 | 0 | -8.831623 | 0.824660  | -0.370183 |
| 88 | 1 | 0 | -7.613373 | 2.045803  | -0.752872 |
| 89 | 1 | 0 | -7.578816 | 0.469353  | -1.571672 |
| 90 | 7 | 0 | 6.960812  | 0.440911  | -0.466964 |
| 91 | 7 | 0 | -6.960724 | 0.441351  | 0.466542  |
| 92 | 6 | 0 | 7.780316  | 0.970878  | 0.614197  |
| 93 | 1 | 0 | 8.831824  | 0.824062  | 0.369597  |
| 94 | 1 | 0 | 7.614052  | 2.046012  | 0.751361  |
| 95 | 1 | 0 | 7.578789  | 0.470126  | 1.571215  |
| 96 | 6 | 0 | -7.590145 | -0.338613 | 1.523699  |
| 97 | 1 | 0 | -7.347199 | 0.061304  | 2.515658  |
| 98 | 1 | 0 | -8.672076 | -0.296450 | 1.402303  |
| 99 | 1 | 0 | -7.283988 | -1.393165 | 1.497617  |

-----

**Supplementary Table S7.** Optimised atomic coordinates obtained from DFT calculations of [2]<sup>+</sup>.

| Center Number | Atomic Number | Atomic Type | Coordinates (Angstroms) |           |           |
|---------------|---------------|-------------|-------------------------|-----------|-----------|
|               |               |             | X                       | Y         | Z         |
| 1             | 77            | 0           | -0.000010               | -0.608058 | -0.000067 |
| 2             | 7             | 0           | 1.357243                | 1.162958  | -0.157204 |
| 3             | 1             | 0           | 1.282574                | -2.588739 | -2.216710 |



|    |   |   |           |           |           |
|----|---|---|-----------|-----------|-----------|
| 4  | 6 | 0 | 1.761645  | -2.805556 | -1.269939 |
| 5  | 6 | 0 | 1.386345  | -2.086925 | -0.124712 |
| 6  | 6 | 0 | 2.752533  | -3.794973 | -1.202727 |
| 7  | 6 | 0 | 2.021778  | -2.399829 | 1.105702  |
| 8  | 6 | 0 | 3.385147  | -4.086881 | 0.020343  |
| 9  | 6 | 0 | 1.576024  | -1.632601 | 2.263219  |
| 10 | 6 | 0 | 3.017566  | -3.393316 | 1.161090  |
| 11 | 1 | 0 | 4.149505  | -4.856361 | 0.046441  |
| 12 | 6 | 0 | 2.052250  | -1.762332 | 3.578001  |
| 13 | 6 | 0 | 0.108066  | 0.058715  | 2.989143  |
| 14 | 6 | 0 | 1.538777  | -0.966921 | 4.589423  |
| 15 | 1 | 0 | 2.826089  | -2.487794 | 3.798610  |
| 16 | 6 | 0 | 0.538068  | -0.021405 | 4.309258  |
| 17 | 1 | 0 | -0.659420 | 0.765992  | 2.697758  |
| 18 | 1 | 0 | 1.913041  | -1.074379 | 5.603711  |
| 19 | 7 | 0 | 0.598527  | -0.715921 | 1.999243  |
| 20 | 1 | 0 | -1.282529 | -2.589504 | 2.215918  |
| 21 | 6 | 0 | -1.761743 | -2.805901 | 1.269123  |
| 22 | 6 | 0 | -1.386498 | -2.086864 | 0.124139  |
| 23 | 6 | 0 | -2.752760 | -3.795184 | 1.201659  |
| 24 | 6 | 0 | -2.022096 | -2.399213 | -1.106329 |
| 25 | 6 | 0 | -3.385573 | -4.086491 | -0.021460 |
| 26 | 6 | 0 | -3.018034 | -3.392531 | -1.161981 |
| 27 | 6 | 0 | -1.576301 | -1.631654 | -2.263613 |
| 28 | 1 | 0 | -4.150034 | -4.855865 | -0.047782 |
| 29 | 6 | 0 | -2.052637 | -1.760855 | -3.578405 |
| 30 | 6 | 0 | -0.108029 | 0.059580  | -2.989078 |
| 31 | 6 | 0 | -1.539071 | -0.965212 | -4.589602 |
| 32 | 1 | 0 | -2.826611 | -2.486115 | -3.799206 |
| 33 | 6 | 0 | -0.538171 | -0.019980 | -4.309188 |
| 34 | 1 | 0 | 0.659668  | 0.766559  | -2.697528 |
| 35 | 1 | 0 | -1.913414 | -1.072276 | -5.603903 |
| 36 | 7 | 0 | -0.598605 | -0.715258 | -1.999396 |
| 37 | 8 | 0 | -3.176435 | -4.535188 | 2.265039  |
| 38 | 1 | 0 | -3.511748 | -3.631058 | -2.099748 |
| 39 | 6 | 0 | 0.044702  | 0.870351  | -5.375993 |
| 40 | 6 | 0 | -0.044533 | 0.868784  | 5.376327  |
| 41 | 1 | 0 | 3.511140  | -3.632268 | 2.098821  |
| 42 | 8 | 0 | 3.176227  | -4.534626 | -2.266391 |
| 43 | 7 | 0 | -1.357258 | 1.163071  | 0.157529  |
| 44 | 6 | 0 | 2.773638  | 1.075674  | -0.117316 |
| 45 | 6 | 0 | 3.463611  | 0.355089  | -1.103713 |
| 46 | 6 | 0 | 3.510692  | 1.625547  | 0.943534  |
| 47 | 6 | 0 | 4.845505  | 0.242677  | -1.072553 |
| 48 | 1 | 0 | 2.909764  | -0.108013 | -1.912032 |
| 49 | 6 | 0 | 4.890899  | 1.492655  | 1.002285  |

|    |   |   |           |           |           |
|----|---|---|-----------|-----------|-----------|
| 50 | 1 | 0 | 2.991455  | 2.142293  | 1.744669  |
| 51 | 6 | 0 | 5.606824  | 0.814537  | -0.019195 |
| 52 | 1 | 0 | 5.337012  | -0.303370 | -1.867542 |
| 53 | 1 | 0 | 5.414110  | 1.909641  | 1.853264  |
| 54 | 6 | 0 | -2.773637 | 1.075851  | 0.117800  |
| 55 | 6 | 0 | -3.463497 | 0.355052  | 1.104124  |
| 56 | 6 | 0 | -3.510827 | 1.625907  | -0.942863 |
| 57 | 6 | 0 | -4.845399 | 0.242695  | 1.073138  |
| 58 | 1 | 0 | -2.909550 | -0.108289 | 1.912237  |
| 59 | 6 | 0 | -4.891046 | 1.493069  | -1.001445 |
| 60 | 1 | 0 | -2.991681 | 2.142713  | -1.744017 |
| 61 | 6 | 0 | -5.606865 | 0.814886  | 0.020067  |
| 62 | 1 | 0 | -5.336791 | -0.303595 | 1.868030  |
| 63 | 1 | 0 | -5.414336 | 1.910113  | -1.852346 |
| 64 | 6 | 0 | 0.744637  | 2.309409  | -0.061362 |
| 65 | 6 | 0 | 1.184370  | 3.715260  | -0.114670 |
| 66 | 6 | 0 | 0.000143  | 4.495003  | 0.000200  |
| 67 | 6 | 0 | 2.394121  | 4.367804  | -0.288125 |
| 68 | 6 | 0 | -1.184158 | 3.715376  | 0.115051  |
| 69 | 6 | 0 | 0.000219  | 5.905230  | 0.000209  |
| 70 | 6 | 0 | 2.408990  | 5.785805  | -0.323670 |
| 71 | 1 | 0 | 3.326347  | 3.826038  | -0.382905 |
| 72 | 6 | 0 | -2.393839 | 4.368051  | 0.288521  |
| 73 | 6 | 0 | -1.259084 | 6.542812  | 0.172541  |
| 74 | 6 | 0 | 1.259592  | 6.542681  | -0.172120 |
| 75 | 1 | 0 | 3.361395  | 6.288320  | -0.460207 |
| 76 | 6 | 0 | -2.408560 | 5.786050  | 0.324083  |
| 77 | 1 | 0 | -3.326123 | 3.826386  | 0.383309  |
| 78 | 1 | 0 | -1.314487 | 7.627458  | 0.184894  |
| 79 | 1 | 0 | 1.315102  | 7.627322  | -0.184458 |
| 80 | 1 | 0 | -3.360912 | 6.288662  | 0.460628  |
| 81 | 6 | 0 | -0.744569 | 2.309474  | 0.061685  |
| 82 | 6 | 0 | 7.674519  | -0.069627 | -1.000131 |
| 83 | 1 | 0 | 7.494482  | 0.330695  | -2.005340 |
| 84 | 1 | 0 | 8.746290  | -0.024258 | -0.809643 |
| 85 | 1 | 0 | 7.370740  | -1.125176 | -0.995022 |
| 86 | 6 | 0 | -7.723917 | 1.241878  | -1.144368 |
| 87 | 1 | 0 | -8.789026 | 1.092438  | -0.970138 |
| 88 | 1 | 0 | -7.550735 | 2.317910  | -1.265575 |
| 89 | 1 | 0 | -7.459099 | 0.745690  | -2.088217 |
| 90 | 7 | 0 | 6.976439  | 0.707003  | 0.015463  |
| 91 | 7 | 0 | -6.976528 | 0.707631  | -0.014269 |
| 92 | 6 | 0 | 7.723749  | 1.241710  | 1.145394  |
| 93 | 1 | 0 | 8.788821  | 1.091353  | 0.971752  |
| 94 | 1 | 0 | 7.551251  | 2.317968  | 1.265739  |
| 95 | 1 | 0 | 7.458194  | 0.746422  | 2.089493  |

|     |   |   |           |           |           |
|-----|---|---|-----------|-----------|-----------|
| 96  | 6 | 0 | -7.674375 | -0.070044 | 1.000689  |
| 97  | 1 | 0 | -7.493558 | 0.328944  | 2.006269  |
| 98  | 1 | 0 | -8.746241 | -0.023870 | 0.810911  |
| 99  | 1 | 0 | -7.371125 | -1.125751 | 0.994089  |
| 100 | 1 | 0 | 0.827262  | 1.516956  | -4.971436 |
| 101 | 1 | 0 | 0.479711  | 0.278426  | -6.188371 |
| 102 | 1 | 0 | -0.726724 | 1.509654  | -5.819142 |
| 103 | 1 | 0 | -0.826382 | 1.516285  | 4.971833  |
| 104 | 1 | 0 | -0.480405 | 0.276734  | 6.188161  |
| 105 | 1 | 0 | 0.727257  | 1.507123  | 5.820219  |
| 106 | 6 | 0 | -2.576314 | -4.308029 | 3.538314  |
| 107 | 6 | 0 | 2.577171  | -4.306268 | -3.539613 |
| 108 | 1 | 0 | 2.744669  | -3.279240 | -3.884105 |
| 109 | 1 | 0 | -2.743490 | -3.281294 | 3.883777  |
| 110 | 1 | 0 | 3.061276  | -5.000703 | -4.227235 |
| 111 | 1 | 0 | 1.500125  | -4.508383 | -3.518383 |
| 112 | 1 | 0 | -3.060093 | -5.003065 | 4.225541  |
| 113 | 1 | 0 | -1.499340 | -4.510289 | 3.515998  |

**Supplementary Table S8.** Optimised atomic coordinates obtained from DFT calculations of [3]<sup>+</sup>.

| Center Number | Atomic Number | Atomic Type | Coordinates (Angstroms) |           |           |
|---------------|---------------|-------------|-------------------------|-----------|-----------|
|               |               |             | X                       | Y         | Z         |
| 1             | 77            | 0           | 0.013279                | -0.547317 | 0.109542  |
| 2             | 7             | 0           | -1.308052               | 1.253468  | 0.169766  |
| 3             | 1             | 0           | -1.639866               | -2.521745 | 2.135733  |
| 4             | 6             | 0           | -1.996420               | -2.686795 | 1.123272  |
| 5             | 6             | 0           | -1.440968               | -1.967766 | 0.058606  |
| 6             | 6             | 0           | -3.021445               | -3.623405 | 0.938770  |
| 7             | 6             | 0           | -1.952626               | -2.247394 | -1.236517 |
| 8             | 6             | 0           | -3.519871               | -3.869453 | -0.347323 |
| 9             | 6             | 0           | -1.331248               | -1.501677 | -2.333753 |
| 10            | 6             | 0           | -2.979160               | -3.178884 | -1.435031 |
| 11            | 6             | 0           | -1.650910               | -1.619686 | -3.693232 |
| 12            | 6             | 0           | 0.310548                | 0.087664  | -2.875905 |
| 13            | 6             | 0           | -0.970806               | -0.868125 | -4.639092 |
| 14            | 1             | 0           | -2.431583               | -2.303877 | -4.003109 |
| 15            | 6             | 0           | 0.044659                | 0.014541  | -4.240313 |
| 16            | 1             | 0           | 1.086130                | 0.740776  | -2.497878 |
| 17            | 1             | 0           | -1.222872               | -0.965749 | -5.691199 |
| 18            | 7             | 0           | -0.348019               | -0.637179 | -1.949529 |
| 19            | 1             | 0           | 1.620774                | -2.493952 | -1.976288 |
| 20            | 6             | 0           | 1.896848                | -2.771612 | -0.963091 |

|    |   |   |           |           |           |
|----|---|---|-----------|-----------|-----------|
| 21 | 6 | 0 | 1.347393  | -2.082986 | 0.124210  |
| 22 | 6 | 0 | 2.808163  | -3.822881 | -0.798283 |
| 23 | 6 | 0 | 1.749838  | -2.508124 | 1.419484  |
| 24 | 6 | 0 | 3.190783  | -4.221325 | 0.489478  |
| 25 | 6 | 0 | 2.658086  | -3.558873 | 1.598781  |
| 26 | 6 | 0 | 1.178253  | -1.748680 | 2.535306  |
| 27 | 6 | 0 | 1.428943  | -1.968346 | 3.896621  |
| 28 | 6 | 0 | -0.220893 | 0.052989  | 3.102873  |
| 29 | 1 | 0 | 2.087519  | -2.774321 | 4.197260  |
| 30 | 6 | 0 | -0.012652 | -0.112967 | 4.469377  |
| 31 | 1 | 0 | -0.865869 | 0.840702  | 2.733111  |
| 32 | 7 | 0 | 0.344078  | -0.733141 | 2.163941  |
| 33 | 1 | 0 | 3.206292  | -4.321085 | -1.674963 |
| 34 | 1 | 0 | 2.974303  | -3.884193 | 2.584879  |
| 35 | 6 | 0 | -0.674860 | 0.792944  | 5.474499  |
| 36 | 6 | 0 | 0.817430  | 0.845445  | -5.231510 |
| 37 | 1 | 0 | -3.378654 | -3.392076 | -2.421419 |
| 38 | 1 | 0 | -3.418742 | -4.150236 | 1.798911  |
| 39 | 7 | 0 | 1.430166  | 1.209332  | 0.038118  |
| 40 | 6 | 0 | -2.720323 | 1.220132  | 0.018222  |
| 41 | 6 | 0 | -3.518332 | 0.485808  | 0.907579  |
| 42 | 6 | 0 | -3.343680 | 1.848590  | -1.071662 |
| 43 | 6 | 0 | -4.895349 | 0.427247  | 0.750746  |
| 44 | 1 | 0 | -3.055743 | -0.031164 | 1.739932  |
| 45 | 6 | 0 | -4.717282 | 1.771720  | -1.255599 |
| 46 | 1 | 0 | -2.740050 | 2.385678  | -1.796864 |
| 47 | 6 | 0 | -5.542127 | 1.072536  | -0.336023 |
| 48 | 1 | 0 | -5.472293 | -0.133501 | 1.474925  |
| 49 | 1 | 0 | -5.148592 | 2.249790  | -2.125862 |
| 50 | 6 | 0 | 2.829594  | 1.137195  | -0.202389 |
| 51 | 6 | 0 | 3.414108  | 1.801312  | -1.293796 |
| 52 | 6 | 0 | 3.654129  | 0.337289  | 0.602724  |
| 53 | 6 | 0 | 4.769966  | 1.684906  | -1.566643 |
| 54 | 1 | 0 | 2.796367  | 2.409577  | -1.947600 |
| 55 | 6 | 0 | 5.016003  | 0.238277  | 0.358862  |
| 56 | 1 | 0 | 3.227960  | -0.191659 | 1.445644  |
| 57 | 6 | 0 | 5.620538  | 0.908318  | -0.737147 |
| 58 | 1 | 0 | 5.166940  | 2.195807  | -2.434640 |
| 59 | 1 | 0 | 5.614297  | -0.371514 | 1.023819  |
| 60 | 6 | 0 | -0.664441 | 2.385892  | 0.196006  |
| 61 | 6 | 0 | -1.079800 | 3.791241  | 0.349765  |
| 62 | 6 | 0 | 0.124910  | 4.543736  | 0.425401  |
| 63 | 6 | 0 | -2.287065 | 4.450862  | 0.513878  |
| 64 | 6 | 0 | 1.298568  | 3.751410  | 0.289565  |
| 65 | 6 | 0 | 0.153454  | 5.934168  | 0.660201  |
| 66 | 6 | 0 | -2.277273 | 5.851184  | 0.740386  |

|     |   |   |           |           |           |
|-----|---|---|-----------|-----------|-----------|
| 67  | 1 | 0 | -3.233662 | 3.928112  | 0.466903  |
| 68  | 6 | 0 | 2.533393  | 4.370607  | 0.398722  |
| 69  | 6 | 0 | -1.103576 | 6.582331  | 0.808466  |
| 70  | 1 | 0 | -3.227905 | 6.360429  | 0.863666  |
| 71  | 6 | 0 | 2.580930  | 5.769587  | 0.627739  |
| 72  | 1 | 0 | 3.459474  | 3.817879  | 0.307631  |
| 73  | 1 | 0 | -1.137597 | 7.653565  | 0.984681  |
| 74  | 1 | 0 | 3.552805  | 6.246291  | 0.707946  |
| 75  | 6 | 0 | 0.829481  | 2.360743  | 0.145434  |
| 76  | 6 | 0 | -7.714254 | 0.205624  | 0.406751  |
| 77  | 1 | 0 | -7.612793 | 0.541382  | 1.445902  |
| 78  | 1 | 0 | -8.763088 | 0.299226  | 0.126908  |
| 79  | 1 | 0 | -7.442556 | -0.857977 | 0.364641  |
| 80  | 6 | 0 | 7.548508  | 1.466965  | -2.146932 |
| 81  | 1 | 0 | 8.623341  | 1.289105  | -2.158276 |
| 82  | 1 | 0 | 7.130356  | 1.089599  | -3.090056 |
| 83  | 1 | 0 | 7.386767  | 2.551330  | -2.113279 |
| 84  | 8 | 0 | -4.520034 | -4.758730 | -0.641471 |
| 85  | 6 | 0 | -5.097948 | -5.494252 | 0.431170  |
| 86  | 1 | 0 | -5.569196 | -4.832112 | 1.167854  |
| 87  | 1 | 0 | -5.860707 | -6.132397 | -0.017074 |
| 88  | 1 | 0 | -4.354717 | -6.122098 | 0.937719  |
| 89  | 7 | 0 | -6.906502 | 1.015055  | -0.495378 |
| 90  | 7 | 0 | 6.967481  | 0.804999  | -0.987091 |
| 91  | 6 | 0 | 7.800642  | -0.060113 | -0.163072 |
| 92  | 1 | 0 | 7.479082  | -1.108994 | -0.212193 |
| 93  | 1 | 0 | 8.830044  | -0.004657 | -0.515540 |
| 94  | 1 | 0 | 7.787980  | 0.250503  | 0.889054  |
| 95  | 6 | 0 | -7.530645 | 1.618489  | -1.664744 |
| 96  | 1 | 0 | -8.610882 | 1.492421  | -1.598031 |
| 97  | 1 | 0 | -7.320789 | 2.693396  | -1.719825 |
| 98  | 1 | 0 | -7.189947 | 1.156498  | -2.601701 |
| 99  | 6 | 0 | 0.837290  | -1.160333 | 4.856033  |
| 100 | 1 | 0 | 1.034730  | -1.338179 | 5.909284  |
| 101 | 8 | 0 | 4.071089  | -5.234691 | 0.764981  |
| 102 | 6 | 0 | 4.638970  | -5.943424 | -0.330957 |
| 103 | 1 | 0 | 5.300162  | -6.693589 | 0.104940  |
| 104 | 1 | 0 | 3.869350  | -6.445290 | -0.930027 |
| 105 | 1 | 0 | 5.223709  | -5.281312 | -0.981205 |
| 106 | 6 | 0 | 1.436848  | 6.539696  | 0.749414  |
| 107 | 1 | 0 | 1.515036  | 7.609024  | 0.922696  |
| 108 | 1 | 0 | -1.306815 | 1.537995  | 4.985184  |
| 109 | 1 | 0 | -1.300148 | 0.218839  | 6.166523  |
| 110 | 1 | 0 | 0.071486  | 1.322911  | 6.075925  |
| 111 | 1 | 0 | 1.552959  | 1.481206  | -4.732768 |
| 112 | 1 | 0 | 1.349298  | 0.208153  | -5.946126 |

113      1      0      0.146972   1.490423   -5.809361

---

**Supplementary Table S9.** Optimised atomic coordinates obtained from DFT calculations of [4]<sup>+</sup>.

---

| Center Number | Atomic Number | Atomic Type | Coordinates (Angstroms) |           |           |
|---------------|---------------|-------------|-------------------------|-----------|-----------|
|               |               |             | X                       | Y         | Z         |
| 1             | 77            | 0           | -0.967902               | -0.417449 | 0.120356  |
| 2             | 7             | 0           | 0.029509                | 1.580950  | 0.057134  |
| 3             | 1             | 0           | -3.346550               | 0.201047  | 2.284814  |
| 4             | 6             | 0           | -3.721693               | 0.413911  | 1.288159  |
| 5             | 6             | 0           | -2.898075               | 0.220877  | 0.173131  |
| 6             | 6             | 0           | -5.034643               | 0.888012  | 1.173587  |
| 7             | 6             | 0           | -3.463759               | 0.507867  | -1.097347 |
| 8             | 6             | 0           | -5.564082               | 1.180190  | -0.090288 |
| 9             | 6             | 0           | -2.588716               | 0.263282  | -2.247029 |
| 10            | 6             | 0           | -4.773700               | 0.985580  | -1.226078 |
| 11            | 6             | 0           | -2.923572               | 0.453416  | -3.591869 |
| 12            | 6             | 0           | -0.462592               | -0.492351 | -2.900494 |
| 13            | 6             | 0           | -2.003999               | 0.160402  | -4.590884 |
| 14            | 1             | 0           | -3.905805               | 0.828252  | -3.853053 |
| 15            | 6             | 0           | -0.735175               | -0.329616 | -4.258769 |
| 16            | 1             | 0           | 0.495087                | -0.874585 | -2.570486 |
| 17            | 1             | 0           | -2.271620               | 0.309135  | -5.632915 |
| 18            | 7             | 0           | -1.346153               | -0.208340 | -1.926496 |
| 19            | 1             | 0           | -2.110573               | -2.804360 | -1.812200 |
| 20            | 6             | 0           | -2.156510               | -3.142713 | -0.781106 |
| 21            | 6             | 0           | -1.719035               | -2.304065 | 0.250102  |
| 22            | 6             | 0           | -2.659727               | -4.427346 | -0.536871 |
| 23            | 6             | 0           | -1.821828               | -2.811407 | 1.573978  |
| 24            | 6             | 0           | -2.746070               | -4.906097 | 0.777056  |
| 25            | 6             | 0           | -2.324715               | -4.092410 | 1.832450  |
| 26            | 6             | 0           | -1.334878               | -1.918508 | 2.629607  |
| 27            | 6             | 0           | -1.321857               | -2.196850 | 4.003042  |
| 28            | 6             | 0           | -0.347662               | 0.170581  | 3.062473  |
| 29            | 1             | 0           | -1.711601               | -3.141437 | 4.362790  |
| 30            | 6             | 0           | -0.305538               | -0.045785 | 4.437107  |
| 31            | 1             | 0           | 0.025046                | 1.094223  | 2.636590  |
| 32            | 7             | 0           | -0.845220               | -0.724095 | 2.184235  |
| 33            | 1             | 0           | -2.981651               | -5.037880 | -1.372873 |
| 34            | 1             | 0           | -2.401207               | -4.488399 | 2.840142  |
| 35            | 6             | 0           | 0.259411                | 0.990644  | 5.373137  |
| 36            | 6             | 0           | 0.301965                | -0.673618 | -5.297963 |
| 37            | 1             | 0           | -5.210307               | 1.212493  | -2.193549 |

---

|    |   |   |           |           |           |
|----|---|---|-----------|-----------|-----------|
| 38 | 1 | 0 | -5.629226 | 1.023615  | 2.069901  |
| 39 | 7 | 0 | 1.236582  | -0.881828 | -0.076720 |
| 40 | 6 | 0 | -0.645154 | 2.819435  | -0.108405 |
| 41 | 6 | 0 | -1.626449 | 3.231332  | 0.805504  |
| 42 | 6 | 0 | -0.402671 | 3.624702  | -1.233090 |
| 43 | 6 | 0 | -2.296671 | 4.434541  | 0.639499  |
| 44 | 1 | 0 | -1.852955 | 2.610482  | 1.664072  |
| 45 | 6 | 0 | -1.088983 | 4.815008  | -1.425621 |
| 46 | 1 | 0 | 0.319471  | 3.300982  | -1.976341 |
| 47 | 6 | 0 | -2.044535 | 5.271181  | -0.479738 |
| 48 | 1 | 0 | -3.029488 | 4.722918  | 1.382131  |
| 49 | 1 | 0 | -0.887516 | 5.388001  | -2.321653 |
| 50 | 6 | 0 | 1.797717  | -2.155249 | -0.349621 |
| 51 | 6 | 0 | 2.620599  | -2.362722 | -1.471238 |
| 52 | 6 | 0 | 1.481341  | -3.263652 | 0.452002  |
| 53 | 6 | 0 | 3.119709  | -3.620101 | -1.775488 |
| 54 | 1 | 0 | 2.857379  | -1.529918 | -2.126417 |
| 55 | 6 | 0 | 2.002159  | -4.518283 | 0.177757  |
| 56 | 1 | 0 | 0.844886  | -3.131938 | 1.317352  |
| 57 | 6 | 0 | 2.837596  | -4.740606 | -0.949509 |
| 58 | 1 | 0 | 3.724212  | -3.733779 | -2.666187 |
| 59 | 1 | 0 | 1.752498  | -5.335699 | 0.842087  |
| 60 | 6 | 0 | 1.331717  | 1.521263  | 0.029496  |
| 61 | 6 | 0 | 2.399689  | 2.532815  | 0.116603  |
| 62 | 6 | 0 | 3.629614  | 1.813329  | 0.152761  |
| 63 | 6 | 0 | 2.422846  | 3.908625  | 0.261154  |
| 64 | 6 | 0 | 3.441351  | 0.405479  | 0.055833  |
| 65 | 6 | 0 | 4.891857  | 2.431934  | 0.321852  |
| 66 | 6 | 0 | 3.674432  | 4.545722  | 0.431457  |
| 67 | 1 | 0 | 1.518424  | 4.502394  | 0.244406  |
| 68 | 6 | 0 | 4.545945  | -0.421872 | 0.153043  |
| 69 | 6 | 0 | 6.022397  | 1.543454  | 0.383742  |
| 70 | 6 | 0 | 4.871436  | 3.850716  | 0.457379  |
| 71 | 1 | 0 | 3.694008  | 5.624877  | 0.547282  |
| 72 | 6 | 0 | 5.815657  | 0.168617  | 0.318106  |
| 73 | 1 | 0 | 4.466081  | -1.499313 | 0.097813  |
| 74 | 1 | 0 | 5.798801  | 4.388941  | 0.590550  |
| 75 | 1 | 0 | 6.686921  | -0.472094 | 0.391025  |
| 76 | 6 | 0 | 1.985406  | 0.185106  | -0.023623 |
| 77 | 6 | 0 | -3.744511 | 6.864080  | 0.291836  |
| 78 | 1 | 0 | -3.356058 | 6.936273  | 1.314842  |
| 79 | 1 | 0 | -4.122779 | 7.845899  | 0.008577  |
| 80 | 1 | 0 | -4.588312 | 6.160664  | 0.296916  |
| 81 | 6 | 0 | 4.172098  | -6.186958 | -2.413713 |
| 82 | 1 | 0 | 4.492037  | -7.227618 | -2.450191 |
| 83 | 1 | 0 | 3.627264  | -5.965284 | -3.340962 |

|     |   |   |           |           |           |
|-----|---|---|-----------|-----------|-----------|
| 84  | 1 | 0 | 5.070365  | -5.558067 | -2.387451 |
| 85  | 6 | 0 | 7.455033  | 1.957473  | 0.528250  |
| 86  | 8 | 0 | 8.352175  | 1.182394  | 0.814141  |
| 87  | 8 | 0 | 7.671958  | 3.261353  | 0.285239  |
| 88  | 6 | 0 | 9.040477  | 3.703732  | 0.402982  |
| 89  | 8 | 0 | -6.830601 | 1.651210  | -0.317190 |
| 90  | 6 | 0 | -7.680507 | 1.851802  | 0.806820  |
| 91  | 1 | 0 | -7.266902 | 2.595460  | 1.498995  |
| 92  | 1 | 0 | -8.626553 | 2.220246  | 0.407855  |
| 93  | 1 | 0 | -7.858038 | 0.916161  | 1.350914  |
| 94  | 7 | 0 | -2.702757 | 6.466175  | -0.645449 |
| 95  | 7 | 0 | 3.342615  | -5.984124 | -1.233127 |
| 96  | 6 | 0 | 2.988866  | -7.126254 | -0.400141 |
| 97  | 1 | 0 | 1.907102  | -7.312932 | -0.400336 |
| 98  | 1 | 0 | 3.485953  | -8.015954 | -0.784863 |
| 99  | 1 | 0 | 3.309829  | -6.982250 | 0.638936  |
| 100 | 6 | 0 | -2.476100 | 7.265169  | -1.841954 |
| 101 | 1 | 0 | -3.055336 | 8.185343  | -1.771753 |
| 102 | 1 | 0 | -1.419599 | 7.540247  | -1.944475 |
| 103 | 1 | 0 | -2.781231 | 6.738409  | -2.756592 |
| 104 | 6 | 0 | -0.814182 | -1.268890 | 4.899852  |
| 105 | 1 | 0 | -0.809092 | -1.491163 | 5.963096  |
| 106 | 8 | 0 | -3.222358 | -6.141311 | 1.129651  |
| 107 | 6 | 0 | -3.673965 | -7.005542 | 0.092625  |
| 108 | 1 | 0 | -4.008825 | -7.919061 | 0.585838  |
| 109 | 1 | 0 | -4.512345 | -6.567088 | -0.462194 |
| 110 | 1 | 0 | -2.867930 | -7.249873 | -0.610044 |
| 111 | 1 | 0 | 1.218048  | -0.091315 | -5.153247 |
| 112 | 1 | 0 | 0.578194  | -1.732201 | -5.247030 |
| 113 | 1 | 0 | -0.071833 | -0.470486 | -6.304099 |
| 114 | 1 | 0 | 0.613394  | 1.869684  | 4.829285  |
| 115 | 1 | 0 | -0.495658 | 1.319031  | 6.095340  |
| 116 | 1 | 0 | 1.099883  | 0.583980  | 5.945513  |
| 117 | 1 | 0 | 9.412354  | 3.525211  | 1.413856  |
| 118 | 1 | 0 | 9.671807  | 3.175648  | -0.314363 |
| 119 | 1 | 0 | 9.020375  | 4.770010  | 0.183943  |

**Supplementary Table S10.** Optimised atomic coordinates obtained from DFT calculations of [5]<sup>+</sup>.

| Center Number | Atomic Number | Atomic Type | Coordinates (Angstroms) |           |          |
|---------------|---------------|-------------|-------------------------|-----------|----------|
|               |               |             | X                       | Y         | Z        |
| 1             | 77            | 0           | -0.548431               | -0.711965 | 0.123600 |
| 2             | 7             | 0           | -0.637938               | 1.520501  | 0.077341 |



|    |   |   |           |           |           |
|----|---|---|-----------|-----------|-----------|
| 3  | 1 | 0 | -2.959257 | -1.303014 | 2.258681  |
| 4  | 6 | 0 | -3.376868 | -1.304903 | 1.256282  |
| 5  | 6 | 0 | -2.548017 | -1.079309 | 0.151250  |
| 6  | 6 | 0 | -4.753236 | -1.528830 | 1.124988  |
| 7  | 6 | 0 | -3.165964 | -1.104012 | -1.127012 |
| 8  | 6 | 0 | -5.341125 | -1.536213 | -0.146763 |
| 9  | 6 | 0 | -2.269661 | -0.886562 | -2.265412 |
| 10 | 6 | 0 | -4.541194 | -1.323769 | -1.272642 |
| 11 | 6 | 0 | -2.639692 | -0.875923 | -3.614422 |
| 12 | 6 | 0 | -0.038631 | -0.501025 | -2.891416 |
| 13 | 6 | 0 | -1.683385 | -0.674483 | -4.601491 |
| 14 | 1 | 0 | -3.676828 | -1.027422 | -3.888034 |
| 15 | 6 | 0 | -0.340836 | -0.482984 | -4.253068 |
| 16 | 1 | 0 | 0.980044  | -0.367563 | -2.550120 |
| 17 | 1 | 0 | -1.978306 | -0.668383 | -5.646742 |
| 18 | 7 | 0 | -0.958863 | -0.692243 | -1.928716 |
| 19 | 1 | 0 | -0.370258 | -3.331608 | -1.835008 |
| 20 | 6 | 0 | -0.270134 | -3.662947 | -0.805623 |
| 21 | 6 | 0 | -0.307729 | -2.729374 | 0.235927  |
| 22 | 6 | 0 | -0.100194 | -5.034184 | -0.573952 |
| 23 | 6 | 0 | -0.178922 | -3.238986 | 1.556729  |
| 24 | 6 | 0 | 0.029233  | -5.511027 | 0.737093  |
| 25 | 6 | 0 | -0.010401 | -4.607301 | 1.802501  |
| 26 | 6 | 0 | -0.191547 | -2.232547 | 2.622581  |
| 27 | 6 | 0 | -0.071270 | -2.484380 | 3.995987  |
| 28 | 6 | 0 | -0.306914 | 0.071577  | 3.074705  |
| 29 | 1 | 0 | 0.021537  | -3.504564 | 4.348356  |
| 30 | 6 | 0 | -0.187766 | -0.111833 | 4.449574  |
| 31 | 1 | 0 | -0.402224 | 1.066266  | 2.656718  |
| 32 | 7 | 0 | -0.316310 | -0.944065 | 2.187185  |
| 33 | 1 | 0 | -0.073883 | -5.714608 | -1.417436 |
| 34 | 1 | 0 | 0.096509  | -5.003094 | 2.807488  |
| 35 | 6 | 0 | -0.185600 | 1.060802  | 5.395268  |
| 36 | 6 | 0 | 0.744147  | -0.270347 | -5.278467 |
| 37 | 1 | 0 | -5.020935 | -1.339320 | -2.246169 |
| 38 | 1 | 0 | -5.350113 | -1.695532 | 2.014535  |
| 39 | 7 | 0 | 1.606839  | -0.055539 | -0.051861 |
| 40 | 6 | 0 | -1.829032 | 2.277085  | -0.085455 |
| 41 | 6 | 0 | -2.880545 | 2.165445  | 0.836087  |
| 42 | 6 | 0 | -2.016653 | 3.088771  | -1.215754 |
| 43 | 6 | 0 | -4.056068 | 2.882526  | 0.668557  |
| 44 | 1 | 0 | -2.768234 | 1.522302  | 1.700935  |
| 45 | 6 | 0 | -3.199948 | 3.787673  | -1.408822 |
| 46 | 1 | 0 | -1.232250 | 3.153169  | -1.963658 |
| 47 | 6 | 0 | -4.253161 | 3.722333  | -0.459148 |
| 48 | 1 | 0 | -4.832007 | 2.782295  | 1.416554  |

|    |   |   |           |           |           |
|----|---|---|-----------|-----------|-----------|
| 49 | 1 | 0 | -3.309658 | 4.379100  | -2.308701 |
| 50 | 6 | 0 | 2.712228  | -0.898701 | -0.326309 |
| 51 | 6 | 0 | 3.548526  | -0.662584 | -1.432875 |
| 52 | 6 | 0 | 2.955973  | -2.040609 | 0.454524  |
| 53 | 6 | 0 | 4.595928  | -1.516837 | -1.739942 |
| 54 | 1 | 0 | 3.362290  | 0.192747  | -2.075097 |
| 55 | 6 | 0 | 4.021010  | -2.882804 | 0.177820  |
| 56 | 1 | 0 | 2.321365  | -2.251341 | 1.305631  |
| 57 | 6 | 0 | 4.877431  | -2.650920 | -0.931953 |
| 58 | 1 | 0 | 5.192288  | -1.308155 | -2.618783 |
| 59 | 1 | 0 | 4.187915  | -3.733462 | 0.825970  |
| 60 | 6 | 0 | 0.531329  | 2.095835  | 0.053610  |
| 61 | 6 | 0 | 0.977979  | 3.497035  | 0.141588  |
| 62 | 6 | 0 | 2.401698  | 3.460467  | 0.193522  |
| 63 | 6 | 0 | 0.332279  | 4.713550  | 0.270589  |
| 64 | 6 | 0 | 2.916750  | 2.136237  | 0.100529  |
| 65 | 6 | 0 | 3.206865  | 4.611958  | 0.369672  |
| 66 | 6 | 0 | 1.119099  | 5.876411  | 0.443022  |
| 67 | 1 | 0 | -0.746152 | 4.796294  | 0.238813  |
| 68 | 6 | 0 | 4.282553  | 1.943749  | 0.210555  |
| 69 | 6 | 0 | 4.625209  | 4.377448  | 0.446053  |
| 70 | 6 | 0 | 2.502522  | 5.845587  | 0.488044  |
| 71 | 1 | 0 | 0.614556  | 6.832103  | 0.545299  |
| 72 | 6 | 0 | 5.107862  | 3.073083  | 0.383286  |
| 73 | 1 | 0 | 4.732571  | 0.961501  | 0.158432  |
| 74 | 1 | 0 | 3.051387  | 6.766269  | 0.623260  |
| 75 | 1 | 0 | 6.179624  | 2.933263  | 0.464321  |
| 76 | 6 | 0 | 1.748239  | 1.240692  | 0.007118  |
| 77 | 6 | 0 | -6.521318 | 4.262708  | 0.305142  |
| 78 | 1 | 0 | -6.226742 | 4.530204  | 1.327029  |
| 79 | 1 | 0 | -7.340977 | 4.918080  | 0.012225  |
| 80 | 1 | 0 | -6.896333 | 3.230193  | 0.317969  |
| 81 | 6 | 0 | 6.781800  | -3.228563 | -2.364999 |
| 82 | 1 | 0 | 7.567426  | -3.982211 | -2.402520 |
| 83 | 1 | 0 | 6.224882  | -3.270004 | -3.310282 |
| 84 | 1 | 0 | 7.260172  | -2.244107 | -2.293649 |
| 85 | 6 | 0 | 5.677332  | 5.427737  | 0.601896  |
| 86 | 8 | 0 | 6.852348  | 5.182523  | 0.815223  |
| 87 | 8 | 0 | 5.231834  | 6.692886  | 0.468408  |
| 88 | 1 | 0 | 6.000340  | 7.277422  | 0.588976  |
| 89 | 8 | 0 | -6.673479 | -1.742169 | -0.390842 |
| 90 | 6 | 0 | -7.530637 | -1.965120 | 0.723347  |
| 91 | 1 | 0 | -7.534862 | -1.107950 | 1.407728  |
| 92 | 1 | 0 | -8.531677 | -2.100436 | 0.311593  |
| 93 | 1 | 0 | -7.244768 | -2.866197 | 1.279625  |
| 94 | 7 | 0 | -5.416659 | 4.434735  | -0.628832 |

|     |   |   |           |           |           |
|-----|---|---|-----------|-----------|-----------|
| 95  | 7 | 0 | 5.923803  | -3.490028 | -1.216533 |
| 96  | 6 | 0 | 6.157236  | -4.674949 | -0.400514 |
| 97  | 1 | 0 | 5.297285  | -5.356607 | -0.417488 |
| 98  | 1 | 0 | 7.021573  | -5.211232 | -0.790244 |
| 99  | 1 | 0 | 6.363820  | -4.412376 | 0.644639  |
| 100 | 6 | 0 | -5.622274 | 5.218790  | -1.839038 |
| 101 | 1 | 0 | -6.581358 | 5.731633  | -1.773083 |
| 102 | 1 | 0 | -4.842193 | 5.979941  | -1.958802 |
| 103 | 1 | 0 | -5.629872 | 4.593725  | -2.742803 |
| 104 | 6 | 0 | -0.072148 | -1.434848 | 4.902489  |
| 105 | 1 | 0 | 0.019403  | -1.638401 | 5.965533  |
| 106 | 8 | 0 | 0.198445  | -6.827272 | 1.077461  |
| 107 | 6 | 0 | 0.249339  | -7.788795 | 0.029069  |
| 108 | 1 | 0 | 0.389727  | -8.755996 | 0.513561  |
| 109 | 1 | 0 | -0.682769 | -7.806973 | -0.548785 |
| 110 | 1 | 0 | 1.089037  | -7.600770 | -0.651120 |
| 111 | 1 | 0 | 1.273529  | 0.672835  | -5.107578 |
| 112 | 1 | 0 | 1.488701  | -1.072708 | -5.239126 |
| 113 | 1 | 0 | 0.327525  | -0.246441 | -6.287982 |
| 114 | 1 | 0 | -0.301140 | 2.006237  | 4.859819  |
| 115 | 1 | 0 | -1.001239 | 0.979672  | 6.121610  |
| 116 | 1 | 0 | 0.750259  | 1.104283  | 5.962644  |

---

## Transient absorption, emission, and steady-state photoluminescence spectra

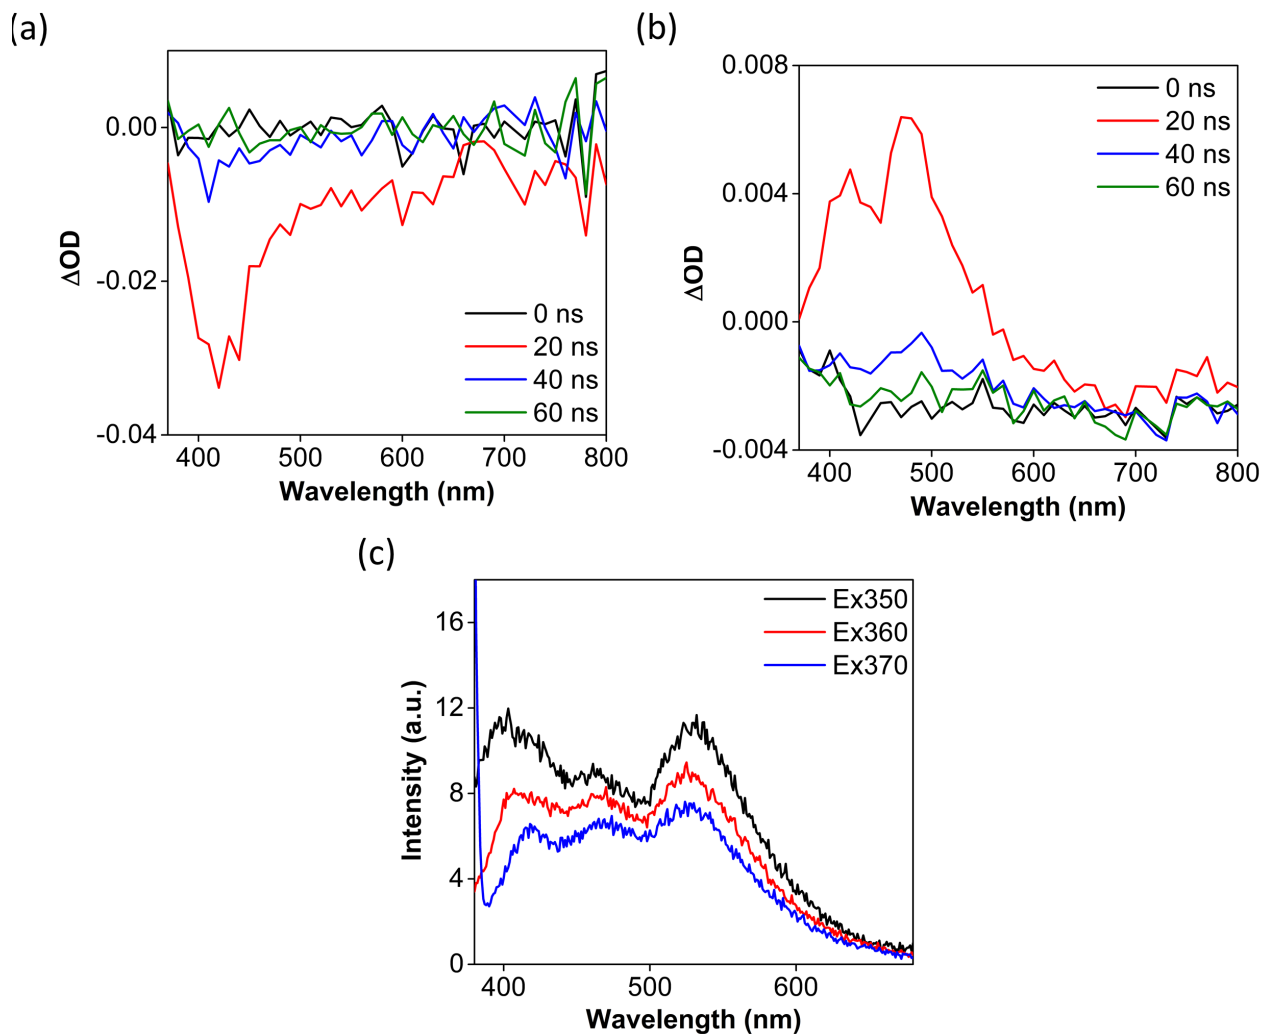

**Supplementary Figure S28.** Transient (a) absorption and (b) emission spectra of 0.050 mM solutions of **5** collected in MeCN at 298, after irradiation at 355 nm. (c) Steady-state photoluminescence spectra of a 0.050 mM solution of **5** collected in MeCN at 298 K.

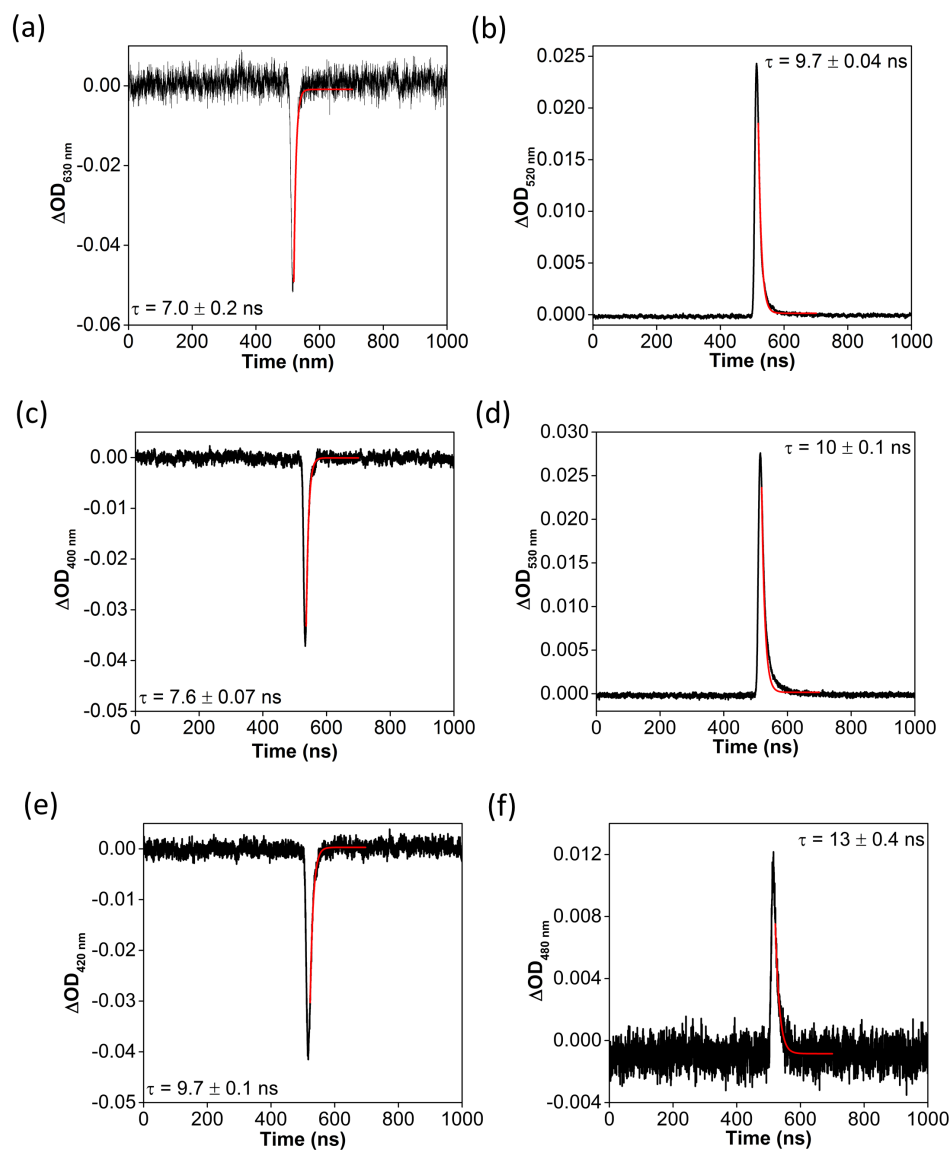

**Supplementary Figure S29.** Transient (a) absorption spectrum at 630 nm and (b) emission spectrum at 520 nm for 0.050 mM **4** in DCM. Transient (c) absorption spectrum at 400 nm and (d) emission spectrum at 530 nm for 0.050 mM **4** in MeCN. Transient (e) absorption spectrum at 420 nm and (f) emission spectrum at 480 nm for 0.050 mM **5** in MeCN. All samples were irradiated at 355 nm.

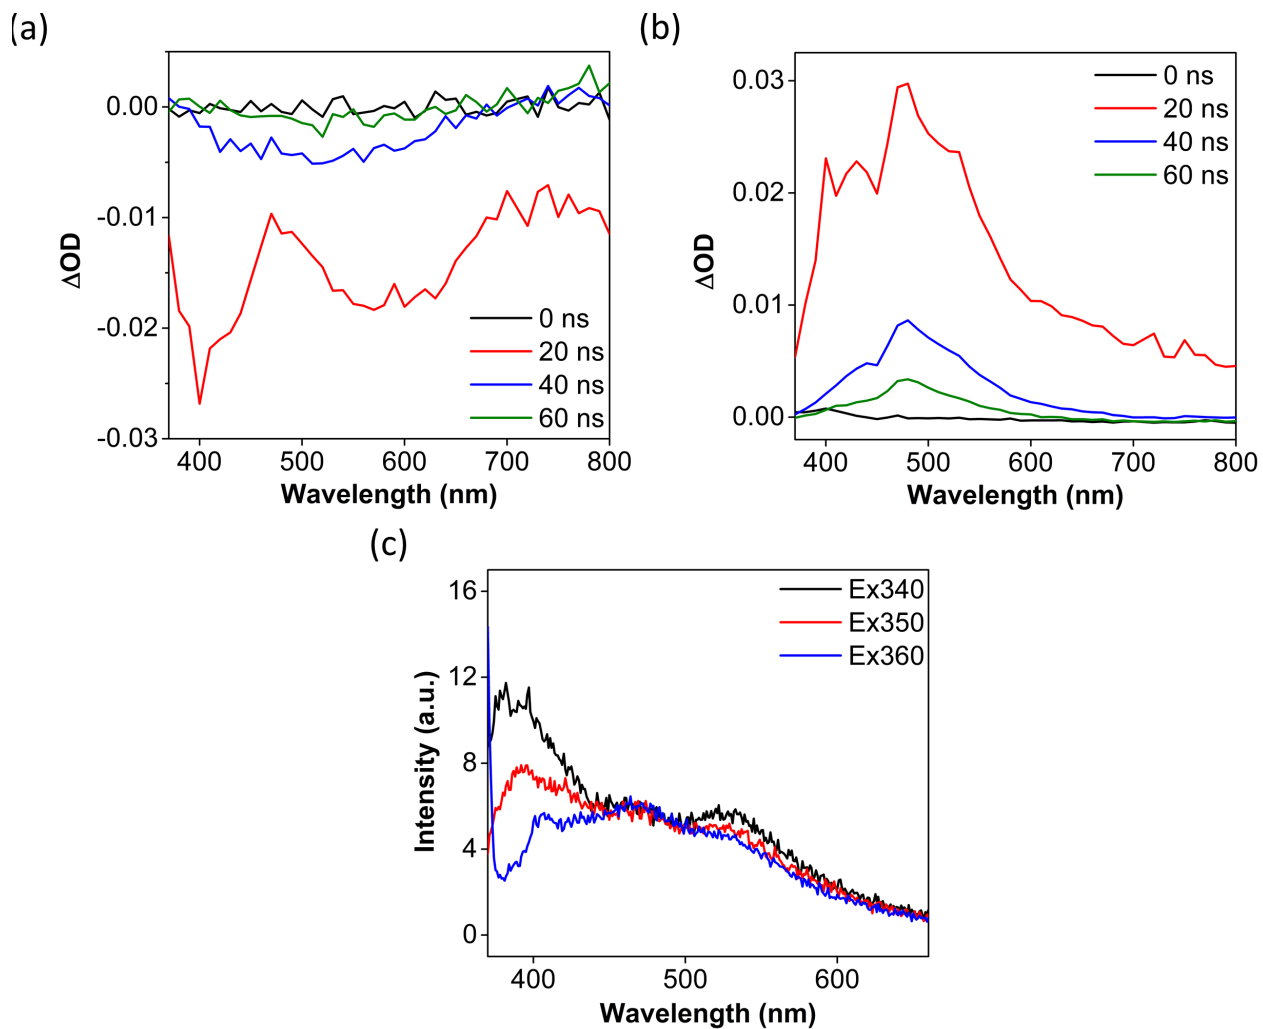

**Supplementary Figure S30.** Transient (a) absorption and (b) emission spectra of 0.050 mM solutions of **4** collected in MeCN at 298, after irradiation at 355 nm. (c) Steady-state photoluminescence spectra of a 0.050 mM solution of **4** collected in MeCN at 298 K.

## References

- 1 Nonoyama, M. Benzo[*h*]quinolin-10-yl-*N* iridium (III) complexes. *Bull. Chem. Soc. Jpn.* **47**, 767-768 (1974).
- 2 Hasan, K. & Zysman-Colman, E. Synthesis, UV–vis and CV properties of a structurally related series of bis(arylimino)acenaphthenes (Ar-BIANs). *J. Phys. Org. Chem.* **26**, 274-279 (2013).
- 3 Ross, S. D., Finkelstein, M. & Petersen, R. C. Solvent effects in the reactions of *N*-bromosuccinimide with toluene, fluorene and acenaphthene; evidence for a polar mechanism in propylene carbonate. *J. Am. Chem. Soc.* **80**, 4327-4330 (1958).
- 4 Watanabe, T., Tanaka, Y., Sekiya, K., Akita, Y. & Ohta, A. A convenient synthesis of methylamino and dimethylamino substituted aromatic compounds. *Synthesis* **1980**, 39-41 (1980).
- 5 Popp, T. A. & Bracher, F. *N*-methylation of aromatic amines and *n*-heterocycles under acidic conditions with the TTT (1,3,5-trioxane–triethylsilane–trifluoroacetic acid) system. *Synthesis* **47**, 3333-3338 (2015).
- 6 Hanaya, K., Muramatsu, T., Kudo, H. & Chow, Y. L. Reduction of aromatic nitro-compounds to amines with sodium borohydride-copper(II) acetylacetonate. *J. Chem. Soc., Perkin Trans. 1*, 2409-2410 (1979).
- 7 Sakai, N., Asama, S., Konakahara, T. & Ogiwara, Y. Iridium(III)-catalyzed reduction of nitrobenzenes to anilines: Scope and limitations. *Synthesis* **47**, 3179-3185 (2015).
- 8 Hasan, K. *et al.* Tuning the emission of cationic iridium (III) complexes towards the red through methoxy substitution of the cyclometalating ligand. *Sci. Rep.* **5**, 12325 (2015).
- 9 Li, W. J. *et al.* An improved protocol for the preparation of 3-pyridyl- and some arylboronic acids. *J. Org. Chem.* **67**, 5394-5397 (2002).
- 10 Deng, J. Z. *et al.* Copper-facilitated suzuki reactions: Application to 2-heterocyclic boronates. *Org. Lett.* **11**, 345-347 (2008).
- 11 Sindhuja, E., Ramesh, R. & Liu, Y. Palladium(II) thiocarboxamide complexes: Synthesis, characterisation and application to catalytic suzuki coupling reactions. *Dalton Trans.* **41**, 5351-5361 (2012).
- 12 Sasaki, I., Vendier, L., Sournia-Saquet, A. & Lacroix, P. G. Facile synthesis of cyclometalated ruthenium complexes with substituted phenylpyridines. *Eur. J. Inorg. Chem.*, 3294-3302 (2006).
- 13 Lloyd, D. G. *et al.* Benzoxepin-derived estrogen receptor modulators: A novel molecular scaffold for the estrogen receptor. *J. Med. Chem.* **47**, 5612-5615 (2004).
- 14 Sasaki, I., Vendier, L., Sournia-Saquet, A. & Lacroix, P. G. Facile synthesis of cyclometalated ruthenium complexes with substituted phenylpyridines. *Eur. J. Inorg. Chem.* **2006**, 3294-3302 (2006).
- 15 Pavlishchuk, V. V. & Addison, A. W. Conversion constants for redox potentials measured versus different reference electrodes in acetonitrile solutions at 25 degrees C. *Inorg. Chim. Acta* **298**, 97-102 (2000).
- 16 Gaussian 09, Revision D.01, M. J. Frisch *et al.* Gaussian, Inc., Wallingford CT (2013).
- 17 Becke, A. D. Density functional thermochemistry. III. The role of exact exchange. *J. Chem. Phys.* **98**, 5648-5652 (1993).
- 18 Lee, C., Yang, W. & Parr, R. G. Development of the colle-salvetti correlation-energy formula into a functional of the electron density. *Phys. Rev. B* **37**, 785-789 (1988).

- 19 McLean, A. D. & Chandler, G. S. Contracted gaussian basis sets for molecular calculations. I. Second row atoms, Z=11–18. *J. Chem. Phys.* **72**, 5639-5648 (1980).
- 20 Binkley, J. S., Pople, J. A. & Hehre, W. J. Self-consistent molecular orbital methods. 21. Small split-valence basis sets for first-row elements. *J. Am. Chem. Soc.* **102**, 939-947 (1980).
- 21 Casida, M. E., Jamorski, C., Casida, K. C. & Salahub, D. R. Molecular excitation energies to high-lying bound states from time-dependent density-functional response theory: Characterisation and correction of the time-dependent local density approximation ionisation threshold. *J. Chem. Phys.* **108**, 4439-4449 (1998).
- 22 Stratmann, R. E., Scuseria, G. E. & Frisch, M. J. An efficient implementation of time-dependent density-functional theory for the calculation of excitation energies of large molecules. *J. Chem. Phys.* **109**, 8218-8224 (1998).
- 23 Cossi, M., Rega, N., Scalmani, G. & Barone, V. Energies, structures, and electronic properties of molecules in solution with the c-pcm solvation model. *J. Comput. Chem.* **24**, 669-681 (2003).
- 24 M. Cossi, V. B. Time-dependent density functional theory for molecules in liquid solutions. *J. Chem. Phys.* **115**, 4708-4717 (2001).
- 25 Barone, V. & Cossi, M. Quantum calculation of molecular energies and energy gradients in solution by a conductor solvent model. *J. Phys. Chem. A* **102**, 1995-2001 (1998).
- 26 Browne, W. R., O'Boyle, N. M., McGarvey, J. J. & Vos, J. G. Elucidating excited state electronic structure and intercomponent interactions in multicomponent and supramolecular systems. *Chem. Soc. Rev.* **34**, 641-663 (2005).
- 27 O'Boyle, N. M., Tenderholt, A. L. & Langner, K. M. GaussSum v2.2. *J. Comp. Chem.* **29**, 839-845 (2008).
- 28 D. A. Zhurko, G. A. Z. *Chemcraft v1.5; Plimus: San Diego, ca., <<http://www.chemcraftprog.com>>*
